# Supplementary material
Source: PubMed Central journal article supplement (PMC6326545)
Supplement: cb8b00644_si_001.pdf [file cb8b00644_si_001.pdf]

## **Supporting Information**

### **Protein–lipid interfaces can drive the functions of membrane-embedded protein–protein complexes**

Debayan Sarkar, Yashaswi Singh and Jeet Kalia\*

*Indian Institute of Science Education and Research (IISER) Pune*

*Dr. Homi Bhabha Road, Pashan, Pune–411008, Maharashtra, India.*

**Current address:** *Department of Biological Sciences,*

*Indian Institute of Science Education and Research (IISER) Bhopal*

*Bhopal Bypass Road, Bhauri, Bhopal–462066, Madhya Pradesh, India*

\*Correspondence may be addressed to:

Dr. Jeet Kalia,

Assistant Professor and Wellcome Trust-DBT India Alliance Intermediate Fellow

Tel.: +91-755-2691437; Email: [jeet@iiserb.ac.in](mailto:jeet@iiserb.ac.in)

## Table of Contents

| <b>S. No.</b> | <b>Experimental topic/Table/Figure</b>                                                                                                                     | <b>Pg. No.</b> |
|---------------|------------------------------------------------------------------------------------------------------------------------------------------------------------|----------------|
| 1             | Detailed protocol for generating the interaction map of the DkTx–lipids–TRPV1 complex                                                                      | 3              |
| 2             | Table S1: Map of interactions between DkTx and TRPV1/lipids                                                                                                | 4-19           |
| 3             | Detailed procedure for the production of DkTx and its variants                                                                                             | 19-20          |
| 4             | Figure S1: Representative DkTx purification data                                                                                                           | 20             |
| 5             | Figure S2: HPLC traces for purity evaluation of all our DkTx variants                                                                                      | 21-22          |
| 6             | Electrophysiology and data analysis                                                                                                                        | 23             |
| 7             | Figure S3: Representative electrophysiological recordings of the DkTx variants                                                                             | 24-25          |
| 8             | Membrane partitioning experiments on LUVs and oocytes                                                                                                      | 26             |
| 9             | Figure S4: Interaction of DkTx and its variants with lipid membranes measured using tryptophan fluorescence                                                | 27             |
| 10            | Figure S5: Mol. fraction partition coefficients of DkTx variants of K2 knot residues                                                                       | 28             |
| 11            | Figure S6: Toxin depletion assays performed with DkTx and its variants                                                                                     | 28             |
| 12            | Table S2: Consolidated data summary for all DkTx variants                                                                                                  | 29             |
| 13            | Figure S7: Potency (EC <sub>50</sub> ) vs. mol. partitioning coefficient (K <sub>x</sub> ), and Potency (EC <sub>50</sub> ) vs. fractional depletion plots | 30             |
| 14            | Structural characterization of DkTx and its variants by Circular Dichroism (CD)                                                                            | 30             |
| 15            | Figure S8: CD spectra of DkTx and its variants                                                                                                             | 30             |
| 16            | References                                                                                                                                                 | 31             |

## **Detailed protocol for generating the interaction map of the DkTx–lipids–TRPV1 complex**

The distances between the atoms of the amino acids of DkTx and those of lipid molecules/amino acids of TRPV1 were calculated by separately analyzing two pdb files of the DkTx-TRPV1 complex—one obtained from a recently published cryo-EM structure<sup>1</sup> and the other from a previously published docking model<sup>2</sup>—by using the UCSF-CHIMERA software. In this software, the command “**split**” was entered in the command line to split the PDB structure into individual peptide chains. Subsequently, each of the four monomers of the TRPV1 channel was assigned a unique model number (0, 1, 2 or 3), the two DkTx chains were assigned model numbers 4 and 5 respectively, and each of the resiniferatoxin and lipid molecules (which were present in the cryo-EM structure but not in the docking model) were assigned unique model numbers between 6 and 25. The command “**distance #a:x@ #b:y@**” was used to obtain the distance values between the amino acid residue number “x” of the DkTx chain assigned the chain model number “a” and the amino acid residue number “y” of the TRPV1 chain assigned the chain model number “b”. This command yielded the distances between every possible pairs of atoms (one each belonging to the residues “x” and “y” respectively) under analysis. For every DkTx residue, this analysis was performed with respect to every amino acid residue of each of the four monomers of the channel’s pore region formed by its S5, S6 and pore helices. For determining the distance between the amino acid residues of a particular DkTx chain and a lipid molecule assigned a model number “z”, the command, “**distance #a:x@ #z@**” was used. This analysis was performed for every DkTx residue with respect to all the lipid molecules in the cryo-EM structure. The distance output obtained from these analyses was saved as a “.txt” file and this data was filtered manually to select for distances within the 4.4 Å cut-off distance to yield a list of TRPV1 residues/lipid molecules proximal to each DkTx residue. The resulting interaction map is depicted in Table S1 (next page).

**Table S1. Map of interactions between DkTx and TRPV1/lipids.**

Lipids are numbered according to the scheme employed in Figure 6 of the main text of the manuscript. The paper that reported the docking model<sup>2</sup> also reported MD simulations to predict lipid-interacting residues of DkTx—this information is also provided in the table below.

| 5irx structure <sup>1</sup>         |              | Docking model <sup>2</sup>                      |              |
|-------------------------------------|--------------|-------------------------------------------------|--------------|
| toxin residue:channel residue/lipid | distance (Å) | toxin residue:channel residue                   | distance (Å) |
| 1 ASP(CB):535 LYS(NZ)               | 4.374        |                                                 |              |
| 7 GLU(N):lipid 1 6O9(H011)          | 4.124        | Predicted as lipid-interacting (MD simulations) |              |
| 7 GLU(CA):lipid 1 6O9(N01)          | 3.41         |                                                 |              |
| 7 GLU(CA):lipid 1 6O9(H012)         | 3.661        |                                                 |              |
| 7 GLU(CA):lipid 1 6O9(H011)         | 2.88         |                                                 |              |
| 7 GLU(C):lipid 1 6O9(N01)           | 3.741        |                                                 |              |
| 7 GLU(C):lipid 1 6O9(H012)          | 3.627        |                                                 |              |
| 7 GLU(C):lipid 1 6O9(H011)          | 3.298        |                                                 |              |
| 7 GLU(CB):lipid 1 6O9(N01)          | 3.4          |                                                 |              |
| 7 GLU(CB):lipid 1 6O9(H012)         | 3.696        |                                                 |              |
| 7 GLU(CB):lipid 1 6O9(H011)         | 3.221        |                                                 |              |
| 7 GLU(CG):lipid 1 6O9(N01)          | 3.733        |                                                 |              |
| 7 GLU(CG):lipid 1 6O9(H012)         | 4.3          |                                                 |              |
| 7 GLU(CG):lipid 1 6O9(H011)         | 3.594        |                                                 |              |
| 8 VAL(N):lipid 1 6O9(N01)           | 3.06         | Predicted as lipid-interacting (MD simulations) |              |
| 8 VAL(N):lipid 1 6O9(H012)          | 2.674        |                                                 |              |
| 8 VAL(N):lipid 1 6O9(H011)          | 2.815        |                                                 |              |
| 8 VAL(N):lipid 1 6O9(H032)          | 4.218        |                                                 |              |
| 8 VAL(CA):lipid 1 6O9(N01)          | 4.09         |                                                 |              |
| 8 VAL(CA):lipid 1 6O9(H012)         | 3.468        |                                                 |              |
| 8 VAL(CA):lipid 1 6O9(H011)         | 3.947        |                                                 |              |
| 8 VAL(C):lipid 1 6O9(H012)          | 4.354        |                                                 |              |
| 8 VAL(O):lipid 1 6O9(H012)          | 4.229        |                                                 |              |
| 8 VAL(CB):lipid 1 6O9(N01)          | 3.948        |                                                 |              |
| 8 VAL(CB):lipid 1 6O9(H012)         | 3.168        |                                                 |              |
| 8 VAL(CB):lipid 1 6O9(H011)         | 3.958        |                                                 |              |
| 8 VAL(CB):lipid 1 6O9(H032)         | 3.655        |                                                 |              |
| 8 VAL(CB):lipid 1 6O9(H101)         | 3.827        |                                                 |              |
| 8 VAL(CG1):lipid 1 6O9(H101)        | 3.7          |                                                 |              |
| 8 VAL(CG1):lipid 1 6O9(H112)        | 4.222        |                                                 |              |
| 8 VAL(CG2):lipid 1 6O9(N01)         | 3.763        |                                                 |              |

| 5irx structure <sup>1</sup>         |              | Docking model <sup>2</sup>                      |              |
|-------------------------------------|--------------|-------------------------------------------------|--------------|
| toxin residue:channel residue/lipid | distance (Å) | toxin residue:channel residue                   | distance (Å) |
| 8 VAL(CG2):lipid 1 6O9(C03)         | 3.782        |                                                 |              |
| 8 VAL(CG2):lipid 1 6O9(C20)         | 4.395        |                                                 |              |
| 8 VAL(CG2):lipid 1 6O9(O22)         | 3.614        |                                                 |              |
| 8 VAL(CG2):lipid 1 6O9(H012)        | 3.157        |                                                 |              |
| 8 VAL(CG2):lipid 1 6O9(H011)        | 3.569        |                                                 |              |
| 8 VAL(CG2):lipid 1 6O9(H032)        | 2.903        |                                                 |              |
| 8 VAL(CG2):lipid 1 6O9(H031)        | 3.951        |                                                 |              |
| 8 VAL(CG2):lipid 1 6O9(H101)        | 3.673        |                                                 |              |
|                                     |              |                                                 |              |
| 10 SER(N):653 TYR(O)                | 4.372        | Predicted as lipid-interacting (MD simulations) |              |
| 10 SER(CA):653 TYR(O)               | 3.953        |                                                 |              |
| 10 SER(CA):655 PHE(N)               | 4.347        |                                                 |              |
| 10 SER(CA):656 LYS(N)               | 3.685        |                                                 |              |
| 10 SER(CA):656 LYS(CA)              | 4.242        |                                                 |              |
| 10 SER(CA):656 LYS(CB)              | 3.839        |                                                 |              |
| 10 SER(CA):657 ALA(N)               | 3.974        |                                                 |              |
| 10 SER(C):655 PHE(N)                | 3.803        |                                                 |              |
| 10 SER(C):655 PHE(CA)               | 3.89         |                                                 |              |
| 10 SER(C):655 PHE(C)                | 4.15         |                                                 |              |
| 10 SER(C):656 LYS(N)                | 3.513        |                                                 |              |
| 10 SER(C):656 LYS(CA)               | 4.377        |                                                 |              |
| 10 SER(C):657 ALA(N)                | 3.695        |                                                 |              |
| 10 SER(C):657 ALA(CB)               | 4.175        |                                                 |              |
| 10 SER(O):655 PHE(N)                | 3.604        |                                                 |              |
| 10 SER(O):655 PHE(CA)               | 3.242        |                                                 |              |
| 10 SER(O):655 PHE(C)                | 3.301        |                                                 |              |
| 10 SER(O):655 PHE(O)                | 4.309        |                                                 |              |
| 10 SER(O):656 LYS(N)                | 2.809        |                                                 |              |
| 10 SER(O):656 LYS(CA)               | 3.652        |                                                 |              |
| 10 SER(O):656 LYS(C)                | 3.616        |                                                 |              |
| 10 SER(O):656 LYS(CB)               | 4.137        |                                                 |              |
| 10 SER(O):657 ALA(N)                | 2.735        |                                                 |              |
| 10 SER(O):657 ALA(CA)               | 3.615        |                                                 |              |
| 10 SER(O):657 ALA(C)                | 4.301        |                                                 |              |
| 10 SER(O):657 ALA(CB)               | 3.488        |                                                 |              |
| 10 SER(O):658 VAL(N)                | 3.952        |                                                 |              |
| 10 SER(CB):656 LYS(N)               | 4.086        |                                                 |              |
| 10 SER(CB):656 LYS(CA)              | 4.145        |                                                 |              |
| 10 SER(CB):656 LYS(C)               | 4.141        |                                                 |              |

| 5irx structure <sup>1</sup>         |              | Docking model <sup>2</sup>                      |              |
|-------------------------------------|--------------|-------------------------------------------------|--------------|
| toxin residue:channel residue/lipid | distance (Å) | toxin residue:channel residue                   | distance (Å) |
| 10 SER(CB):656 LYS(CB)              | 3.575        |                                                 |              |
| 10 SER(CB):656 LYS(CG)              | 4.285        |                                                 |              |
| 10 SER(CB):657 ALA(N)               | 3.407        |                                                 |              |
| 10 SER(CB):657 ALA(CA)              | 4.149        |                                                 |              |
| 10 SER(CB):657 ALA(CB)              | 3.78         |                                                 |              |
|                                     |              |                                                 |              |
| 11 TRP(N):655 PHE(N)                | 4.22         | Predicted as lipid-interacting (MD simulations) |              |
| 11 TRP(CA):655 PHE(N)               | 4.292        |                                                 |              |
| 11 TRP(CA):655 PHE(CA)              | 4.347        |                                                 |              |
| 11 TRP(C):655 PHE(N)                | 4.043        |                                                 |              |
| 11 TRP(C):655 PHE(CA)               | 4.313        |                                                 |              |
| 11 TRP(C):655 PHE(CG)               | 4.352        |                                                 |              |
| 11 TRP(C):655 PHE(CD1)              | 4.064        |                                                 |              |
| 11 TRP(C):655 PHE(CE1)              | 4.079        |                                                 |              |
| 11 TRP(C):655 PHE(CZ)               | 4.347        |                                                 |              |
| 11 TRP(O):655 PHE(N)                | 3.4          | 11 TRP(CA):655 PHE(N)                           | 3.953        |
| 11 TRP(O):655 PHE(CA)               | 3.627        | 11 TRP(CA):655 PHE(CA)                          | 4.169        |
| 11 TRP(O):655 PHE(CB)               | 4            | 11 TRP(CA):655 PHE(CD2)                         | 4.371        |
| 11 TRP(O):655 PHE(CG)               | 3.213        | 11 TRP(C):655 PHE(N)                            | 3.576        |
| 11 TRP(O):655 PHE(CD1)              | 3.028        | 11 TRP(C):655 PHE(CA)                           | 4.21         |
| 11 TRP(O):655 PHE(CD2)              | 3.401        | 11 TRP(C):655 PHE(CD2)                          | 4.305        |
| 11 TRP(O):655 PHE(CE1)              | 3.069        | 11 TRP(O):655 PHE(N)                            | 2.94         |
| 11 TRP(O):655 PHE(CE2)              | 3.438        | 11 TRP(O):655 PHE(CA)                           | 3.928        |
| 11 TRP(O):655 PHE(CZ)               | 3.256        | 11 TRP(O):655 PHE(CG)                           | 4.5          |
| 11 TRP(CG):657 ALA(CB)              | 4.398        | 11 TRP(O):654 ASP(C)                            | 3.69         |
| 11 TRP(CD1):657 ALA(CB)             | 3.935        | 11 TRP(O):654 ASP(CA)                           | 3.488        |
| 11 TRP(CD2):657 ALA(CB)             | 4.217        | 11 TRP(O):654 ASP(CB)                           | 3.868        |
| 11 TRP(CD2):658 VAL(CG2)            | 3.505        | 11 TRP(CG):655 PHE(CD2)                         | 4.24         |
| 11 TRP(NE1):657 ALA(CB)             | 3.38         | 11 TRP(CD1):657 ALA(CB)                         | 4.279        |
| 11 TRP(CE2):657 ALA(CB)             | 3.575        | 11 TRP(CD2):658 VAL(CG2)                        | 3.941        |
| 11 TRP(CE3):657 ALA(CG2)            | 3.505        | 11 TRP(NE1):657 ALA(CB)                         | 4.127        |
| 11 TRP(CZ2):657 ALA(CB)             | 3.895        | 11 TRP(CE3):657 ALA(CG2)                        | 3.596        |
| 11 TRP(CZ3):658 VAL(CG2)            | 3.531        | 11 TRP(CE3):655 PHE(CD2)                        | 4.018        |
| 11 TRP(CH2):658 VAL(CG2)            | 4.311        | 11 TRP(CE3):657 PHE(CE2)                        | 4.252        |
| 11 TRP(CH2):661 ILE(CD2)            | 4.318        | 11 TRP(CZ3):658 VAL(CG2)                        | 3.89         |
|                                     |              | 11 TRP(CB):655 PHE(N)                           | 4.108        |
|                                     |              | 11 TRP(CB):655 PHE(CA)                          | 3.838        |
|                                     |              | 11 TRP(CB):655 PHE(CG)                          | 4.017        |
|                                     |              | 11 TRP(CB):655 PHE(CD2)                         | 3.31         |

| 5irx structure <sup>1</sup>         |              | Docking model <sup>2</sup>    |              |
|-------------------------------------|--------------|-------------------------------|--------------|
| toxin residue:channel residue/lipid | distance (Å) | toxin residue:channel residue | distance (Å) |
|                                     |              | 11 TRP(CB):655 PHE(CE2)       | 3.71         |
| 11 TRP (CB):lipid 1 6O9 (H112)      | 3.682        |                               |              |
| 11 TRP (CG):lipid 1 6O9 (O18)       | 4.233        |                               |              |
| 11 TRP (CG):lipid 1 6O9 (H112)      | 3.841        |                               |              |
| 11 TRP (CD1):lipid 1 6O9 (H112)     | 4.28         |                               |              |
| 11 TRP (CD2):lipid 1 6O9 (C13)      | 4.054        |                               |              |
| 11 TRP (CD2):lipid 1 6O9 (O18)      | 3.745        |                               |              |
| 11 TRP (CD2):lipid 1 6O9 (H112)     | 4.289        |                               |              |
| 11 TRP (CD2):lipid 1 6O9 (H142)     | 4.054        |                               |              |
| 11 TRP (CD2):lipid 1 6O9 (H151)     | 4.183        |                               |              |
| 11 TRP (NE1):lipid 1 6O9 (H142)     | 4.235        |                               |              |
| 11 TRP (CE2):lipid 1 6O9 (C13)      | 4.337        |                               |              |
| 11 TRP (CE2):lipid 1 6O9 (C14)      | 4.345        |                               |              |
| 11 TRP (CE2):lipid 1 6O9 (O18)      | 4.369        |                               |              |
| 11 TRP (CE2):lipid 1 6O9 (H142)     | 3.669        |                               |              |
| 11 TRP (CE2):lipid 1 6O9 (H151)     | 4.324        |                               |              |
| 11 TRP (CE2):lipid 1 6O9 (H162)     | 4.279        |                               |              |
| 11 TRP (CE3):lipid 2 6OE (H181)     | 4.255        |                               |              |
| 11 TRP (CE3):lipid 1 6O9 (C13)      | 4.076        |                               |              |
| 11 TRP (CE3):lipid 1 6O9 (C15)      | 4.345        |                               |              |
| 11 TRP (CE3):lipid 1 6O9 (O18)      | 3.463        |                               |              |
| 11 TRP (CE3):lipid 1 6O9 (H142)     | 4.238        |                               |              |
| 11 TRP (CE3):lipid 1 6O9 (H151)     | 3.535        |                               |              |
| 11 TRP (CZ2):lipid 1 6O9 (C14)      | 4.215        |                               |              |
| 11 TRP (CZ2):lipid 1 6O9 (C15)      | 4.291        |                               |              |
| 11 TRP (CZ2):lipid 1 6O9 (C16)      | 4.166        |                               |              |
| 11 TRP (CZ2):lipid 1 6O9 (H142)     | 3.496        |                               |              |
| 11 TRP (CZ2):lipid 1 6O9 (H151)     | 3.916        |                               |              |
| 11 TRP (CZ2):lipid 1 6O9 (H162)     | 3.308        |                               |              |
| 11 TRP (CZ3):lipid 2 6OE (H181)     | 4.043        |                               |              |
| 11 TRP (CZ3):lipid 1 6O9 (C13)      | 4.373        |                               |              |
| 11 TRP (CZ3):lipid 1 6O9 (C14)      | 4.287        |                               |              |
| 11 TRP (CZ3):lipid 1 6O9 (C15)      | 3.812        |                               |              |
| 11 TRP (CZ3):lipid 1 6O9 (C16)      | 4.147        |                               |              |
| 11 TRP (CZ3):lipid 1 6O9 (O18)      | 3.878        |                               |              |
| 11 TRP (CZ3):lipid 1 6O9 (H142)     | 4.061        |                               |              |
| 11 TRP (CZ3):lipid 1 6O9 (H151)     | 2.99         |                               |              |
| 11 TRP (CZ3):lipid 1 6O9 (H162)     | 3.604        |                               |              |
| 11 TRP (CZ3):lipid 1 6O9 (H172)     | 4.294        |                               |              |

| 5irx structure <sup>1</sup>         |              | Docking model <sup>2</sup>    |              |
|-------------------------------------|--------------|-------------------------------|--------------|
| toxin residue:channel residue/lipid | distance (Å) | toxin residue:channel residue | distance (Å) |
| 11 TRP (CH2):lipid 1 6O9 (C14)      | 4.176        |                               |              |
| 11 TRP CH2):lipid 1 6O9 (C15)       | 3.786        |                               |              |
| 11 TRP (CH2):lipid 1 6O9 (C16)      | 3.662        |                               |              |
| 11 TRP (CH2):lipid 1 6O9 (C17)      | 4.315        |                               |              |
| 11 TRP (CH2):lipid 1 6O9 (H142)     | 3.698        |                               |              |
| 11 TRP (CH2):lipid 1 6O9 (H151)     | 3.22         |                               |              |
| 11 TRP (CH2):lipid 1 6O9 (H162)     | 2.877        |                               |              |
| 11 TRP (CH2):lipid 1 6O9 (H172)     | 4.185        |                               |              |
|                                     |              |                               |              |
| 12 GLY(C):535 LYS(CD)               | 4.24         | 12 GLY(O):535 LYS(CE)         | 4.374        |
| 12 GLY(C):654 ASP(CB)               | 4.333        | 12 GLY(O):535 LYS(NZ)         | 3.858        |
| 12 GLY(O):535 LYS(CG)               | 4.273        | 12 GLY(O):535 LYS(CD)         | 3.921        |
| 12 GLY(O):535 LYS(CD)               | 3.511        | 12 GLY(O):535 LYS(CE)         | 3.741        |
| 12 GLY(O):654 ASP(CA)               | 4.351        | 12 GLY(O):535 LYS(NZ)         | 2.894        |
| 12 GLY(O):654 ASP(CB)               | 3.545        | 12 GLY(O):654 ASP(CG)         | 4.02         |
| 12 GLY(O):655 PHE(CD2)              | 4.284        | 12 GLY(O):654 ASP(OD1)        | 4.078        |
| 12 GLY(O):655 PHE(CE2)              | 3.907        | 12 GLY(O):654 ASP(OD2)        | 4.156        |
|                                     |              | 12 GLY(N):655 PHE(CE2)        | 4.312        |
|                                     |              | 12 GLY(N):655 PHE(CZ)         | 4.382        |
|                                     |              | 12 GLY(CA):535 LYS(CD)        | 3.84         |
|                                     |              | 12 GLY(CA):535 LYS(CE)        | 4.085        |
|                                     |              | 12 GLY(CA):535 LYS(NZ)        | 4.094        |
|                                     |              | 12 GLY(CA):655 PHE(CZ)        | 4.319        |
|                                     |              |                               |              |
|                                     |              |                               |              |
| 13 LYS(CA):654 ASP(CB)              | 4.163        | 13 LYS(O):654 ASP(OD1)        | 4.219        |
| 13 LYS(C):654 ASP(CA)               | 4.393        |                               |              |
| 13 LYS(C):654 ASP(CB)               | 4.35         |                               |              |
|                                     |              |                               |              |
| 14 LYS (N):654 ASP(N)               | 4.398        | 14 LYS(CD):654 ASP(OD1)       | 4.274        |
| 14 LYS (N):654 ASP(CA)              | 4.112        | 14 LYS(CE):654 ASP(CG)        | 4.244        |
| 14 LYS (N):654 ASP(CB)              | 4.072        | 14 LYS(CE):654 ASP(OD1)       | 3.818        |
| 14 LYS(CA):653 TYR(O)               | 4.36         | 14 LYS(CE):654 ASP(OD2)       | 3.823        |
| 14 LYS(CB):653 TYR(C)               | 3.944        | 14 LYS(NZ):654 ASP(CG)        | 3.386        |
| 14 LYS(CB):653 TYR(O)               | 4.015        | 14 LYS(NZ):652 ASP(OD1)       | 2.958        |
| 14 LYS (CB):654 ASP(N)              | 3.854        | 14 LYS(NZ):652 ASP(OD2)       | 3.129        |
| 14 LYS (CB):654 ASP(CA)             | 4.395        | 14 LYS(CG):652 ASP(OD1)       | 3.571        |
| 14 LYS(CE):652 ASN(C)               | 4.178        |                               |              |
| 14 LYS(CE):652 ASN(O)               | 3.653        |                               |              |



| 5irx structure <sup>1</sup>         |              | Docking model <sup>2</sup>    |              |
|-------------------------------------|--------------|-------------------------------|--------------|
| toxin residue:channel residue/lipid | distance (Å) | toxin residue:channel residue | distance (Å) |
| 14 LYS(CE):652 ASN(CB)              | 3.917        |                               |              |
| 14 LYS(NZ):652 ASN(C)               | 4.107        |                               |              |
| 14 LYS(NZ):652 ASN(O)               | 3.214        |                               |              |
| 14 LYS(NZ):652 ASN(CB)              | 4.222        |                               |              |
|                                     |              |                               |              |
|                                     |              | 23 CYS(CA):656 LYS(NZ)        | 4.201        |
|                                     |              | 23 CYS(C):656 LYS(NZ)         | 3.847        |
|                                     |              | 23 CYS(O):656 LYS(CE)         | 3.623        |
|                                     |              | 23 CYS(O):656 LYS(NZ)         | 2.861        |
|                                     |              | 23 CYS(CB):656 LYS(CE)        | 4.304        |
|                                     |              | 23 CYS(CB):656 LYS(NZ)        | 3.523        |
|                                     |              | 23 CYS(SG):656 LYS(CE)        | 3.91         |
|                                     |              | 23 CYS(SG):656 LYS(NZ)        | 3.783        |
|                                     |              |                               |              |
| 25 MET(C):631 TYR(CD2)              | 3.843        | 25 MET(C):629 SER(OG)         | 4.384        |
| 25 MET(C):631 TYR(CE2)              | 4.08         | 25 MET(SD):648 GLU(OE2)       | 3.909        |
| 25 MET(O):631 TYR(CG)               | 4.358        | 25 MET(SD):650 THR(CG2)       | 3.822        |
| 25 MET(O):631 TYR(CD2)              | 3.191        | 25 MET(CE):635 LEU(CD1)       | 3.934        |
| 25 MET(O):631 TYR(CE2)              | 3.099        | 25 MET(CE):650 THR(CG2)       | 4.226        |
| 25 MET(O):631 TYR(CZ)               | 4.215        | 25 MET(CE):660 ILE(CG1)       | 4.012        |
| 25 MET(CE):635 LEU(CD1)             | 3.732        | 25 MET(N):629 SER(OG)         | 4.296        |
| 25 MET(CE):649 PHE(CB)              | 4.066        | 25 MET(CB):629 SER(OG)        | 4.005        |
| 25 MET(CE):649 PHE(CD2)             | 4.165        | 25 MET(CG):635 LEU(CD1)       | 4.162        |
| 25 MET(CE):660 ILE(CD1)             | 4.374        | 25 MET(CG):648 GLU(OE1)       | 3.394        |
|                                     |              |                               |              |
| 26 GLU(N):631 TYR(CD2)              | 4.194        | 26 GLU(CA):631 TYR(CB)        | 3.822        |
| 26 GLU(CA):631 TYR(CB)              | 3.983        | 26 GLU(CA):631 TYR(CG)        | 3.605        |
| 26 GLU(CA):631 TYR(CG)              | 4.022        | 26 GLU(CA):631 TYR(CD2)       | 3.577        |
| 26 GLU(CA):631 TYR(CD2)             | 3.61         | 26 GLU(CA):631 TYR(CE2)       | 4.153        |
| 26 GLU(CA):631 TYR(CE2)             | 4.367        | 26 GLU(CA):631 TYR(CD1)       | 4.205        |
| 26 GLU(C):631 TYR(CG)               | 4.211        | 26 GLU(N):629 SER(OG)         | 4.094        |
| 26 GLU(C):631 TYR(CD2)              | 3.949        | 26 GLU(N):631 TYR(CB)         | 3.775        |
| 26 GLU(CB):631 TYR(CB)              | 4.287        | 26 GLU(N):631 TYR(CG)         | 4.102        |
| 26 GLU(CB):629 SER(CB)              | 4.395        | 26 GLU(N):631 TYR(CD2)        | 4.191        |
| 26 GLU(CB):629 SER(OG)              | 3.882        | 26 GLU(O):631 TYR(CD2)        | 4.241        |
|                                     |              | 26 GLU(CG):629 SER(CB)        | 4.345        |
|                                     |              | 26 GLU(CG):629 SER(OG)        | 3.585        |
|                                     |              | 26 GLU(CD):629 SER(CB)        | 4.353        |
|                                     |              | 26 GLU(CD):629 SER(OG)        | 3.5          |

| 5irx structure <sup>1</sup>         |              | Docking model <sup>2</sup>                      |              |
|-------------------------------------|--------------|-------------------------------------------------|--------------|
| toxin residue:channel residue/lipid | distance (Å) | toxin residue:channel residue                   | distance (Å) |
|                                     |              | 26 GLU(CD):630 LEU(N)                           | 4.122        |
|                                     |              | 26 GLU(CD):631 TYR(N)                           | 3.938        |
|                                     |              | 26 GLU(CD):631 TYR(CB)                          | 4.164        |
|                                     |              | 26 GLU(CD):631 TYR(CG)                          | 3.969        |
|                                     |              | 26 GLU(CD):631 TYR(CD1)                         | 3.588        |
|                                     |              | 26 GLU(CD):631 TYR(CE1)                         | 4.165        |
|                                     |              | 26 GLU(OE1):631 TYR(CG)                         | 4.008        |
|                                     |              | 26 GLU(OE1):631 TYR(CD1)                        | 3.337        |
|                                     |              | 26 GLU(OE1):631 TYR(CE1)                        | 3.514        |
|                                     |              | 26 GLU(OE1):631 TYR(CZ)                         | 4.302        |
|                                     |              | 26 GLU(OE2):629 SER(CA)                         | 3.509        |
|                                     |              | 26 GLU(OE2):629 SER(C)                          | 3.467        |
|                                     |              | 26 GLU(OE2):629 SER(OG)                         | 4.383        |
|                                     |              | 26 GLU(OE2):629 SER(CB)                         | 3.514        |
|                                     |              | 26 GLU(OE2):629 SER(OG)                         | 2.652        |
|                                     |              | 26 GLU(OE2):630 LEU(N)                          | 2.993        |
|                                     |              | 26 GLU(OE2):630 LEU(CA)                         | 3.685        |
|                                     |              | 26 GLU(OE2):630 LEU(C)                          | 3.788        |
|                                     |              | 26 GLU(OE2):630 LEU(CB)                         | 3.874        |
|                                     |              | 26 GLU(OE2):631 TYR(N)                          | 2.973        |
|                                     |              | 26 GLU(OE2):631 TYR(CA)                         | 3.937        |
|                                     |              | 26 GLU(OE2):631 TYR(CB)                         | 3.738        |
|                                     |              | 26 GLU(OE2):631 TYR(CG)                         | 3.874        |
|                                     |              | 26 GLU(OE2):631 TYR(CD1)                        | 3.489        |
|                                     |              | 26 GLU(OE2):631 TYR(CE1)                        | 4.363        |
| 26 GLU (CA):lipid 3 6OE (O07)       | 3.224        | Predicted as lipid-interacting (MD simulations) |              |
| 26 GLU ( C ):lipid 3 6OE (P05)      | 4.143        |                                                 |              |
| 26 GLU ( C ):lipid 3 6OE (O07)      | 2.638        |                                                 |              |
| 26 GLU ( C ):lipid 3 6OE (H092)     | 4.365        |                                                 |              |
| 26 GLU ( O ):lipid 3 6OE (O04)      | 4.354        |                                                 |              |
| 26 GLU ( O ):lipid 3 6OE (P05)      | 3.236        |                                                 |              |
| 26 GLU ( O ):lipid 3 6OE (O06)      | 3.752        |                                                 |              |
| 26 GLU ( O ):lipid 3 6OE (O07)      | 1.819        |                                                 |              |
| 26 GLU ( O ):lipid 3 6OE (O08)      | 4.04         |                                                 |              |
| 26 GLU ( O ):lipid 3 6OE (H092)     | 3.964        |                                                 |              |
| 26 GLU (CB):lipid 3 6OE (C03)       | 4.166        |                                                 |              |
| 26 GLU (CB):lipid 3 6OE (O04)       | 4.253        |                                                 |              |
| 26 GLU (CB):lipid 3 6OE (P05)       | 4.126        |                                                 |              |
| 26 GLU (CB):lipid 3 6OE (O07)       | 2.973        |                                                 |              |

| 5irx structure <sup>1</sup>         |              | Docking model <sup>2</sup>                      |              |
|-------------------------------------|--------------|-------------------------------------------------|--------------|
| toxin residue:channel residue/lipid | distance (Å) | toxin residue:channel residue                   | distance (Å) |
| 26 GLU (CB):lipid 3 6OE (H031)      | 3.342        |                                                 |              |
| 27 PHE(N):631 TYR(CG)               | 4.312        | 27 PHE(N):631 TYR(CD2)                          | 3.948        |
| 27 PHE(N):631 TYR(CD2)              | 3.796        | 27 PHE(N):631 TYR(CE2)                          | 3.745        |
| 27 PHE(N):631 TYR(CE2)              | 3.822        | 27 PHE(N):631 TYR(CZ)                           | 4.284        |
| 27 PHE(N):631 TYR(CZ)               | 4.351        | 27 PHE(CA):631 TYR(CE2)                         | 4.228        |
| 27 PHE(CA):631 TYR(CE2)             | 4.141        | 27 PHE(CB):631 TYR(CE2)                         | 4.387        |
| 27 PHE(CA):631 TYR(CZ)              | 4.215        |                                                 |              |
| 27 PHE(O):657 ALA(CB)               | 4.14         |                                                 |              |
| 27 PHE(CB):631 TYR(CG)              | 4.044        |                                                 |              |
| 27 PHE(CB):631 TYR(CD1)             | 3.756        |                                                 |              |
| 27 PHE(CB):631 TYR(CD2)             | 4.079        |                                                 |              |
| 27 PHE(CB):631 TYR(CE1)             | 3.515        |                                                 |              |
| 27 PHE(CB):631 TYR(CE2)             | 3.856        |                                                 |              |
| 27 PHE(CB):631 TYR(CZ)              | 3.563        |                                                 |              |
| 27 PHE(CB):631 TYR(OH)              | 4.065        |                                                 |              |
| 27 PHE(CG):631 PHE(CE1)             | 4.03         |                                                 |              |
| 27 PHE(CG):631 TYR(CZ)              | 4.236        |                                                 |              |
| 27 PHE(CG):631 TYR(OH)              | 4.391        |                                                 |              |
| 27 PHE(CD1):631 TYR(CE1)            | 4.125        |                                                 |              |
| 27 PHE(CD1):631 TYR(CZ)             | 4.134        |                                                 |              |
| 27 PHE(CD1):631 TYR(OH)             | 3.855        |                                                 |              |
| 27 PHE(CE1):661 ILE(CD1)            | 3.792        |                                                 |              |
| 27 PHE (N):lipid 3 6OE (O07)        | 3.71         | Predicted as lipid-interacting (MD simulations) |              |
| 27 PHE (CA):lipid 3 6OE (O07)       | 4.244        |                                                 |              |
| 27 PHE (CB):lipid 3 6OE (O07)       | 3.89         |                                                 |              |
| 27 PHE (CB):lipid 3 6OE (C09)       | 4.25         |                                                 |              |
| 27 PHE (CB):lipid 3 6OE (H092)      | 3.33         |                                                 |              |
| 27 PHE (CG):lipid 3 6OE (O20)       | 4.227        |                                                 |              |
| 27 PHE (CG):lipid 3 6OE (H092)      | 3.837        |                                                 |              |
| 27 PHE (CG):lipid 3 6OE (H232)      | 3.635        |                                                 |              |
| 27 PHE (CD1):lipid 3 6OE (H232)     | 3.612        |                                                 |              |
| 27 PHE (CD1):lipid 3 6OE (H252)     | 3.911        |                                                 |              |
| 27 PHE (CD1):lipid 3 6OE (H251)     | 4.309        |                                                 |              |
| 27 PHE (CD2):lipid 3 6OE (O20)      | 3.807        |                                                 |              |
| 27 PHE (CD2):lipid 3 6OE (C21)      | 4.336        |                                                 |              |
| 27 PHE (CD2):lipid 3 6OE (H092)     | 3.786        |                                                 |              |
| 27 PHE (CD2):lipid 3 6OE (H232)     | 3.669        |                                                 |              |
| 27 PHE (CE1):lipid 3 6OE (C25)      | 4.306        |                                                 |              |
| 27 PHE (CE1):lipid 3 6OE (H232)     | 3.624        |                                                 |              |

| <b>5irx structure<sup>1</sup></b>          |                     | <b>Docking model<sup>2</sup></b>                |                     |
|--------------------------------------------|---------------------|-------------------------------------------------|---------------------|
| <b>toxin residue:channel residue/lipid</b> | <b>distance (Å)</b> | <b>toxin residue:channel residue</b>            | <b>distance (Å)</b> |
| 27 PHE (CE1):lipid 3 6OE (H252)            | 3.517               |                                                 |                     |
| 27 PHE (CE1):lipid 3 6OE (H251)            | 4.383               |                                                 |                     |
| 27 PHE (CE2):lipid 3 6OE (O20)             | 4.271               |                                                 |                     |
| 27 PHE (CE2):lipid 3 6OE (C21)             | 4.361               |                                                 |                     |
| 27 PHE (CE2):lipid 3 6OE (H221)            | 3.949               |                                                 |                     |
| 27 PHE (CE2):lipid 3 6OE (H232)            | 3.681               |                                                 |                     |
| 27 PHE (CZ):lipid 3 6OE (H162)             | 4.019               |                                                 |                     |
| 27 PHE (CZ):lipid 3 6OE (H221)             | 4.097               |                                                 |                     |
| 27 PHE (CZ):lipid 3 6OE (H232)             | 3.66                |                                                 |                     |
| 27 PHE (CZ):lipid 3 6OE (H252)             | 4.124               |                                                 |                     |
|                                            |                     |                                                 |                     |
| 28 ILE (N):lipid 3 6OE (O07)               | 4.21                | Predicted as lipid-interacting (MD simulations) |                     |
| 28 ILE (CD1):lipid 1 6O9 (O12)             | 4.395               |                                                 |                     |
| 28 ILE (CD1):lipid 1 6O9 (C14)             | 3.91                |                                                 |                     |
| 28 ILE (CD1):lipid 1 6O9 (H141)            | 3.968               |                                                 |                     |
| 28 ILE (CD1):lipid 1 6O9 (H142)            | 3.078               |                                                 |                     |
|                                            |                     |                                                 |                     |
| 30 HIS                                     |                     | Predicted as lipid-interacting (MD simulations) |                     |
|                                            |                     |                                                 |                     |
| 43 ASN(O):535 LYS(NZ)                      | 4.322               | 43 ASN(OD1):535 LYS(NZ)                         | 4.343               |
| 43 ASN(CB):535 LYS(NZ)                     | 3.708               | 43 ASN(ND2):654 ASP(CG)                         | 3.832               |
|                                            |                     | 43 ASN(ND2):654 ASP(OD1)                        | 4.275               |
|                                            |                     | 43 ASN(ND2):654 ASP(OD2)                        | 3.228               |
|                                            |                     |                                                 |                     |
| 49 GLU (CA):lipid 4 6O9 (N01)              | 3.756               | Predicted as lipid-interacting (MD simulations) |                     |
| 49 GLU (CA):lipid 4 6O9 (H012)             | 4.192               |                                                 |                     |
| 49 GLU (CA):lipid 4 6O9 (H011)             | 3.126               |                                                 |                     |
| 49 GLU ( C ):lipid 4 6O9 (N01)             | 3.955               |                                                 |                     |
| 49 GLU ( C ):lipid 4 6O9 (H012)            | 4.074               |                                                 |                     |
| 49 GLU ( C ):lipid 4 6O9 (H011)            | 3.359               |                                                 |                     |
| 49 GLU (CB):lipid 4 6O9 (N01)              | 3.792               |                                                 |                     |
| 49 GLU (CB):lipid 4 6O9 (H012)             | 4.266               |                                                 |                     |
| 49 GLU (CB):lipid 4 6O9 (H011)             | 3.473               |                                                 |                     |
| 49 GLU (CG):lipid 4 6O9 (N01)              | 4.167               |                                                 |                     |
| 49 GLU (CG):lipid 4 6O9 (H011)             | 3.936               |                                                 |                     |
|                                            |                     |                                                 |                     |
| 50 VAL ( N ):lipid 4 6O9 (N01)             | 3.15                | Predicted as lipid-interacting (MD simulations) |                     |
| 50 VAL ( N ):lipid 4 6O9 (H012)            | 3.03                |                                                 |                     |
| 50 VAL ( N ):lipid 4 6O9 (H011)            | 2.705               |                                                 |                     |

| 5irx structure <sup>1</sup>         |              | Docking model <sup>2</sup>    |              |
|-------------------------------------|--------------|-------------------------------|--------------|
| toxin residue:channel residue/lipid | distance (Å) | toxin residue:channel residue | distance (Å) |
| 50 VAL (CA):lipid 4 6O9 (N01)       | 4.093        |                               |              |
| 50 VAL (CA):lipid 4 6O9 (H012)      | 3.683        |                               |              |
| 50 VAL (CA):lipid 4 6O9 (H011)      | 3.771        |                               |              |
| 50 VAL (CB):lipid 4 6O9 (N01)       | 3.84         |                               |              |
| 50 VAL (CB):lipid 4 6O9 (O06)       | 4.338        |                               |              |
| 50 VAL (CB):lipid 4 6O9 (H012)      | 3.179        |                               |              |
| 50 VAL (CB):lipid 4 6O9 (H011)      | 3.71         |                               |              |
| 50 VAL (CB):lipid 4 6O9 (H032)      | 3.986        |                               |              |
| 50 VAL (CB):lipid 4 6O9 (H101)      | 3.744        |                               |              |
| 50 VAL (CG1):lipid 4 6O9 (H101)     | 3.719        |                               |              |
| 50 VAL (CG1):lipid 4 6O9 (H112)     | 4.041        |                               |              |
| 50 VAL (CG2):lipid 4 6O9 (N01)      | 3.66         |                               |              |
| 50 VAL (CG2):lipid 4 6O9 (C03)      | 4.017        |                               |              |
| 50 VAL (CG2):lipid 4 6O9 (O06)      | 4.276        |                               |              |
| 50 VAL (CG2):lipid 4 6O9 (C10)      | 4.326        |                               |              |
| 50 VAL (CG2):lipid 4 6O9 (C20)      | 4.259        |                               |              |
| 50 VAL (CG2):lipid 4 6O9 (O22)      | 3.538        |                               |              |
| 50 VAL (CG2):lipid 4 6O9 (H012)     | 3.113        |                               |              |
| 50 VAL (CG2):lipid 4 6O9 (H011)     | 3.369        |                               |              |
| 50 VAL (CG2):lipid 4 6O9 (H032)     | 3.094        |                               |              |
| 50 VAL (CG2):lipid 4 6O9 (H031)     | 4.37         |                               |              |
| 50 VAL (CG2):lipid 4 6O9 (H101)     | 3.372        |                               |              |
|                                     |              |                               |              |
|                                     |              | 51 CYS(SG):656 LYS(CE)        | 4.227        |
|                                     |              |                               |              |
| 52 GLY(N):653 TYR(O)                | 4.348        | 52 GLY(C):655 PHE(N)          | 3.692        |
| 52 GLY(CA):653 TYR(O)               | 3.965        | 52 GLY(C):655 PHE(CA)         | 4.042        |
| 52 GLY(CA):656 LYS(N)               | 3.767        | 52 GLY(C):654 ASP(OD1)        | 4.221        |
| 52 GLY(CA):656 LYS(CA)              | 4.307        | 52 GLY(O):655 PHE(CA)         | 3.398        |
| 52 GLY(CA):656 LYS(CB)              | 3.872        | 52 GLY(O):655 PHE(C)          | 4.291        |
| 52 GLY(CA):657 ALA(N)               | 4.045        | 52 GLY(O):656 LYS(N)          | 4.137        |
| 52 GLY(C):655 PHE(N)                | 3.846        | 52 GLY(O):654 ASP(CA)         | 3.973        |
| 52 GLY(C):655 PHE(CA)               | 3.945        | 52 GLY(O):654 ASP(C)          | 3.797        |
| 52 GLY(C):655 PHE(C)                | 4.177        | 52 GLY(O):654 ASP(CG)         | 4.139        |
| 52 GLY(C):656 LYS(N)                | 3.509        | 52 GLY(O):654 ASP(OD1)        | 3.034        |
| 52 GLY(C):656 LYS(CA)               | 4.349        | 52 GLY(O):654 ASP(N)          | 2.753        |
| 52 GLY(C):657 ALA(N)                | 3.676        |                               |              |
| 52 GLY(C):657 ALA(CB)               | 4.163        |                               |              |
| 52 GLY(O):655 PHE(N)                | 3.596        |                               |              |

| <b>5irx structure<sup>1</sup></b>          |                     | <b>Docking model<sup>2</sup></b>     |                     |
|--------------------------------------------|---------------------|--------------------------------------|---------------------|
| <b>toxin residue:channel residue/lipid</b> | <b>distance (Å)</b> | <b>toxin residue:channel residue</b> | <b>distance (Å)</b> |
| 52 GLY(O):655 PHE(CA)                      | 3.261               |                                      |                     |
| 52 GLY(O):655 PHE(C)                       | 3.275               |                                      |                     |
| 52 GLY(O):655 PHE(O)                       | 4.291               |                                      |                     |
| 52 GLY(O):656 LYS(N)                       | 2.73                |                                      |                     |
| 52 GLY(O):656 LYS(CA)                      | 3.552               |                                      |                     |
| 52 GLY(O):656 LYS(C)                       | 3.54                |                                      |                     |
| 52 GLY(O):656 LYS(CB)                      | 4.007               |                                      |                     |
| 52 GLY(O):657 ALA(N)                       | 2.677               |                                      |                     |
| 52 GLY(O):657 ALA(CA)                      | 3.594               |                                      |                     |
| 52 GLY(O):657 ALA(C)                       | 4.319               |                                      |                     |
| 52 GLY(O):657 ALA(CB)                      | 3.49                |                                      |                     |
| 52 GLY(O):658 VAL(N)                       | 3.995               |                                      |                     |
| 53 TRP(N):655 PHE(N)                       | 4.28                | 53 TRP(CA):655 PHE(CD2)              | 4.174               |
| 53 TRP(CA):655 PHE(N)                      | 4.329               | 53 TRP(C):655 PHE(CD2)               | 3.717               |
| 53 TRP(CA):655 PHE(CA)                     | 4.27                | 53 TRP(C):655 PHE(CE2)               | 3.72                |
| 53 TRP(C):655 PHE(N)                       | 4.032               | 53 TRP(O):655 PHE(CD1)               | 3.523               |
| 53 TRP(C):655 PHE(CA)                      | 4.272               | 53 TRP(O):655 PHE(CE2)               | 3.2                 |
| 53 TRP(C):655 PHE(CG)                      | 4.364               | 53 TRP(O):655 PHE(CZ)                | 4.182               |
| 53 TRP(C):655 PHE(CD1)                     | 4.065               | 53 TRP(O):636 GLU(CG)                | 4.113               |
| 53 TRP(C):655 PHE(CE1)                     | 4.112               | 53 TRP(CD1):657 ALA(CB)              | 4.117               |
| 53 TRP(O):655 PHE(N)                       | 3.373               | 53 TRP(CD2):657 ALA(CB)              | 4.02                |
| 53 TRP(O):655 PHE(CA)                      | 3.56                | 53 TRP(CD2):658 VAL(CG2)             |                     |
| 53 TRP(O):655 PHE(CB)                      | 3.961               | 53 TRP(NE1):657 ALA(CB)              | 3.472               |
| 53 TRP(O):655 PHE(CG)                      | 3.209               | 53 TRP(CE2):657 ALA(CB)              | 3.396               |
| 53 TRP(O):655 PHE(CB)                      | 3.004               | 53 TRP(CE3):658 VAL(CG2)             | 3.646               |
| 53 TRP(O):655 PHE(CD1)                     | 3.454               | 53 TRP(CZ2):657 ALA(CB)              | 3.538               |
| 53 TRP(O):655 PHE(CD2)                     | 3.089               | 53 TRP(CZ3):658 VAL(CG2)             | 3.495               |
| 53 TRP(O):655 PHE(CE2)                     | 3.528               | 53 TRP(CH2):658 VAL(CG2)             | 4.305               |
| 53 TRP(O):655 PHE(CZ)                      | 3.332               | 53 TRP(CH2):661 ILE(CD1)             | 3.982               |
| 53 TRP(CG):657 ALA(CB)                     | 4.328               | 53 TRP(CH2):657 ALA(CB)              | 4.256               |
| 53 TRP(CD1):657 ALA(CB)                    | 3.895               |                                      |                     |
| 53 TRP(CD2):657 ALA(CB)                    | 4.166               |                                      |                     |
| 53 TRP(CD2):658 VAL(CG2)                   | 4.305               |                                      |                     |
| 53 TRP(NE1):657 ALA(CB)                    | 3.39                |                                      |                     |
| 53 TRP(CE2):657 ALA(CB)                    | 3.576               |                                      |                     |
| 53 TRP(CE3):658 VAL(CG2)                   | 3.52                |                                      |                     |
| 53 TRP(CZ2):657 ALA(CB)                    | 3.931               |                                      |                     |
| 53 TRP(CZ3):658 VAL(CG2)                   | 3.568               |                                      |                     |
| 53 TRP(CH2):658 VAL(CG2)                   | 4.382               |                                      |                     |

| <b>5irx structure<sup>1</sup></b>          |                     | <b>Docking model<sup>2</sup></b>                |                     |
|--------------------------------------------|---------------------|-------------------------------------------------|---------------------|
| <b>toxin residue:channel residue/lipid</b> | <b>distance (Å)</b> | <b>toxin residue:channel residue</b>            | <b>distance (Å)</b> |
| 53 TRP(CH2):661 ILE(CD1)                   | 4.28                |                                                 |                     |
| 53 TRP (CB):lipid 4 6O9 (H112)             | 3.837               | Predicted as lipid-interacting (MD simulations) |                     |
| 53 TRP (CG):lipid 4 6O9 (O18)              | 4.372               |                                                 |                     |
| 53 TRP (CG):lipid 4 6O9 (H112)             | 3.959               |                                                 |                     |
| 53 TRP (CD1):lipid 4 6O9 (H112)            | 4.371               |                                                 |                     |
| 53 TRP (CD2):lipid 4 6O9 (C13)             | 4.206               |                                                 |                     |
| 53 TRP (CD2):lipid 4 6O9 (O18)             | 3.863               |                                                 |                     |
| 53 TRP (CD2):lipid 4 6O9 (H112)            | 4.37                |                                                 |                     |
| 53 TRP (CD2):lipid 4 6O9 (H142)            | 4.238               |                                                 |                     |
| 53 TRP (CD2):lipid 4 6O9 (H151)            | 4.385               |                                                 |                     |
| 53 TRP (NE1):lipid 4 6O9 (H142)            | 4.33                |                                                 |                     |
| 53 TRP (CE2):lipid 4 6O9 (H142)            | 3.809               |                                                 |                     |
| 53 TRP (CE2):lipid 4 6O9 (H162)            | 4.34                |                                                 |                     |
| 53 TRP (CE3):lipid 4 6O9 (C13)             | 4.252               |                                                 |                     |
| 53 TRP (CE3):lipid 4 6O9 (O18)             | 3.609               |                                                 |                     |
| 53 TRP (CE3):lipid 4 6O9 (H151)            | 3.8                 |                                                 |                     |
| 53 TRP (CE3):lipid 5 6OE (H181)            | 4.36                |                                                 |                     |
| 53 TRP (CZ2):lipid 4 6O9 (C14)             | 4.324               |                                                 |                     |
| 53 TRP (CZ2):lipid 4 6O9 (C15)             | 4.395               |                                                 |                     |
| 53 TRP (CZ2):lipid 4 6O9 (C16)             | 4.237               |                                                 |                     |
| 53 TRP (CZ2):lipid 4 6O9 (H142)            | 3.623               |                                                 |                     |
| 53 TRP (CZ2):lipid 4 6O9 (H151)            | 4.027               |                                                 |                     |
| 53 TRP (CZ2):lipid 4 6O9 (H162)            | 3.369               |                                                 |                     |
| 53 TRP (CZ3):lipid 4 6O9 (C15)             | 4.058               |                                                 |                     |
| 53 TRP (CZ3):lipid 4 6O9 (C16)             | 4.356               |                                                 |                     |
| 53 TRP (CZ3):lipid 4 6O9 (O18)             | 3.964               |                                                 |                     |
| 53 TRP (CZ3):lipid 4 6O9 (H142)            | 4.268               |                                                 |                     |
| 53 TRP (CZ3):lipid 4 6O9 (H151)            | 3.249               |                                                 |                     |
| 53 TRP (CZ3):lipid 4 6O9 (H162)            | 3.764               |                                                 |                     |
| 53 TRP (CZ3):lipid 4 6O9 (H181)            | 4.071               |                                                 |                     |
| 53 TRP (CH2):lipid 4 6O9 (C14)             | 4.326               |                                                 |                     |
| 53 TRP (CH2):lipid 4 6O9 (C15)             | 3.95                |                                                 |                     |
| 53 TRP (CH2):lipid 4 6O9 (C16)             | 3.808               |                                                 |                     |
| 53 TRP (CH2):lipid 4 6O9 (H142)            | 3.86                |                                                 |                     |
| 53 TRP (CH2):lipid 4 6O9 (H151)            | 3.384               |                                                 |                     |
| 53 TRP (CH2):lipid 4 6O9 (H162)            | 3.001               |                                                 |                     |
| 53 TRP (CH2):lipid 4 6O9 (H172)            | 4.324               |                                                 |                     |
|                                            |                     |                                                 |                     |
| 54 GLY(C):654 ASP(CB)                      | 4.365               | 54 GLY(C):654 ASP(CG)                           | 4.043               |

| 5irx structure <sup>1</sup>         |              | Docking model <sup>2</sup>    |              |
|-------------------------------------|--------------|-------------------------------|--------------|
| toxin residue:channel residue/lipid | distance (Å) | toxin residue:channel residue | distance (Å) |
| 54 GLY(O):535 LYS(CD)               | 3.748        | 54 GLY(C):654 ASP(OD1)        | 3.313        |
| 54 GLY(O):654 ASP(CA)               | 4.381        | 54 GLY(C):654 ASP(OD2)        | 4.097        |
| 54 GLY(O):654 ASP(CB)               | 3.601        | 54 GLY(O):654 ASP(CG)         | 3.274        |
| 54 GLY(O):655 PHE(CD2)              | 4.202        | 54 GLY(O):654 ASP(OD1)        | 2.877        |
| 54 GLY(O):655 PHE(CE2)              | 3.813        | 54 GLY(O):654 ASP(OD2)        | 3.072        |
| 54 GLY(O):655 PHE(CZ)               | 4.307        | 54 GLY(N):654 ASP(OD2)        | 3.735        |
|                                     |              | 54 GLY(N):655 PHE(CD2)        | 4.245        |
|                                     |              | 54 GLY(N):655 PHE(CE2)        | 4.143        |
|                                     |              | 54 GLY(CA):654 ASP(OD1)       | 3.683        |
|                                     |              | 54 GLY(CA):655 PHE(CE2)       | 3.909        |
|                                     |              | 54 GLY(CA):655 PHE(CZ)        | 4.109        |
|                                     |              |                               |              |
| 55 SER(CA):654 ASP(CB)              | 4.147        | 55 SER(C):654 ASP(OD1)        | 4.257        |
| 55 SER(C):654 ASP(CA)               | 4.145        | 55 SER(O):654 ASP(CA)         | 4.258        |
| 55 SER(C):654 ASP(CB)               | 4.074        | 55 SER(O):654 ASP(CG)         | 3.897        |
|                                     |              | 55 SER(O):654 ASP(OD1)        | 3.342        |
|                                     |              | 55 SER(N):654 ASP(OD1)        | 4.082        |
|                                     |              |                               |              |
| 56 LYS(N):654 LYS(N)                | 4.35         |                               |              |
| 56 LYS(N):654 LYS(CA)               | 4.043        |                               |              |
| 56 LYS(N):654 LYS(CB)               | 3.885        |                               |              |
| 56 LYS(CA):654 ASP(N)               | 4.344        |                               |              |
| 56 LYS(CG):653 TYR(C)               | 3.924        |                               |              |
| 56 LYS(CG):654 ASP(N)               | 3.414        |                               |              |
| 56 LYS(CG):654 ASP(CA)              | 4.126        |                               |              |
| 56 LYS(CG):654 ASP(CB)              | 4.115        |                               |              |
| 56 LYS(CE):652 ASN(O)               | 4.399        |                               |              |
| 56 LYS(CE):654 ASP(N)               | 4.283        |                               |              |
|                                     |              |                               |              |
|                                     |              | 63 CYS(CB):656 LYS(NZ)        | 4.339        |
|                                     |              | 63 CYS(SG):656 LYS(CE)        | 3.937        |
|                                     |              | 63 CYS(SG):656 LYS(NZ)        | 3.905        |
|                                     |              |                               |              |
| 64 PRO(O):656 LYS(CE)               | 3.623        | 64 PRO(O):656 LYS(CE)         | 4.293        |
|                                     |              | 64 PRO(O):656 LYS(CE)         | 4.06         |
|                                     |              |                               |              |
| 65 LEU(O):632 SER(CB)               | 4.338        | 65 LEU(O):631 TYR(CD2)        | 3.642        |
| 65 LEU(CB):632 SER(CB)              | 4.383        | 65 LEU(O):631 TYR(CE2)        | 3.638        |
| 65 LEU(CG):632 SER(CA)              | 4.386        | 65 LEU(O):635 LEU(CD1)        | 4.074        |



| 5irx structure <sup>1</sup>         |              | Docking model <sup>2</sup>                      |              |
|-------------------------------------|--------------|-------------------------------------------------|--------------|
| toxin residue:channel residue/lipid | distance (Å) | toxin residue:channel residue                   | distance (Å) |
| 65 LEU(CG):632 SER(CB)              | 3.947        | 65 LEU(CB):650 THR(CG2)                         | 4.38         |
| 65 LEU(CD1):635 LEU(CD1)            | 4.301        | 65 LEU(CG):635 LEU(CD1)                         | 3.933        |
| 65 LEU(CD1):660 ILE(CD1)            | 3.747        | 65 LEU(CG):650 THR(CG2)                         | 4.215        |
| 65 LEU(CD2):632 SER(CA)             | 4.163        | 65 LEU(CD1):650 THR(CG2)                        | 3.803        |
| 65 LEU(CD2):632 SER(CB)             | 3.663        | 65 LEU(CD1):656 LYS(O)                          | 4.395        |
|                                     |              | 65 LEU(CD1):657 ALA(CA)                         | 4.186        |
|                                     |              | 65 LEU(CD1):660 ILE(CG1)                        | 3.824        |
|                                     |              | 65 LEU(CD2):635 LEU(CD1)                        | 3.594        |
|                                     |              | 65 LEU(CD2):648 GLU(CB)                         | 4.017        |
|                                     |              | 65 LEU(CD2):648 GLU(CG)                         | 3.754        |
|                                     |              | 65 LEU(CD2):648 GLU(CD)                         | 4.045        |
|                                     |              | 65 LEU(CD2):648 GLU(OE1)                        | 3.419        |
|                                     |              | 65 LEU(CD2):650 THR(CG2)                        | 3.825        |
|                                     |              | 65 LEU(CD2):660 ILE(CG1)                        | 4.235        |
|                                     |              |                                                 |              |
| 66 ALA (CA):lipid 6 6OE (O07)       | 3.781        | 66 ALA(CA):631 TYR(CD2)                         | 3.785        |
| 66 ALA ( C ):lipid 6 6OE (O07)      | 3.886        | 66 ALA(CA):631 TYR(CE2)                         | 4.135        |
| 66 ALA (CB):lipid 6 6OE (O07)       | 3.295        | 66 ALA(O):657 ALA(CB)                           | 4.028        |
|                                     |              | 66 ALA(CB):631 TYR(CD2)                         | 3.803        |
|                                     |              | Predicted as lipid-interacting (MD simulations) |              |
|                                     |              |                                                 |              |
| 67 PHE(N):631 TYR(CB)               | 4.371        | 67 PHE(CE1):631 TYR(CE2)                        | 3.901        |
| 67 PHE(N):631 TYR(CG)               | 3.817        | 67 PHE(CE1):631 TYR(CZ)                         | 3.688        |
| 67 PHE(N):631 TYR(CD1)              | 4.164        | 67 PHE(CE1):631 TYR(OH)                         | 4.224        |
| 67 PHE(N):631 TYR(CD2)              | 3.661        | 67 PHE(CZ):631 TYR(CE1)                         | 4.027        |
| 67 PHE(N):631 TYR(CE1)              | 4.362        | 67 PHE(CZ):631 TYR(CE2)                         | 4.365        |
| 67 PHE(N):631 TYR(CE2)              | 3.879        | 67 PHE(CZ):631 TYR(CZ)                          | 3.88         |
| 67 PHE(N):631 TYR(CZ)               | 4.219        | 67 PHE(CZ):631 TYR(OH)                          | 3.95         |
| 67 PHE(CA):631 TYR(CD1)             | 4.382        |                                                 |              |
| 67 PHE(CA):631 TYR(CD2)             | 4.373        |                                                 |              |
| 67 PHE(CA):631 TYR(CE1)             | 4.216        |                                                 |              |
| 67 PHE(CA):631 TYR(CE2)             | 4.204        |                                                 |              |
| 67 PHE(CA):631 TYR(CZ)              | 4.117        |                                                 |              |
| 67 PHE(O):657 ALA(CB)               | 3.653        |                                                 |              |
| 67 PHE(CB):631 TYR(CD1)             | 4.069        |                                                 |              |
| 67 PHE(CB):631 TYR(CE1)             | 4.006        |                                                 |              |
| 67 PHE(CB):631 TYR(CZ)              | 4.384        |                                                 |              |
| 67 PHE(CD1):631 TYR(CE1)            | 4.04         |                                                 |              |
| 67 PHE(CD1):631 TYR(CZ)             | 4.348        |                                                 |              |

| 5irx structure <sup>1</sup>         |              | Docking model <sup>2</sup>                      |              |
|-------------------------------------|--------------|-------------------------------------------------|--------------|
| toxin residue:channel residue/lipid | distance (Å) | toxin residue:channel residue                   | distance (Å) |
| 67 PHE(CD1):631 TYR(OH)             | 4.24         |                                                 |              |
| 67 PHE(CE1):661 ILE(CD1)            | 3.922        |                                                 |              |
| 67 PHE ( N ):lipid 6 6OE (O07)      | 3.03         | Predicted as lipid-interacting (MD simulations) |              |
| 67 PHE ( N ):lipid 6 6OE (H092)     | 3.986        |                                                 |              |
| 67 PHE (CA):lipid 6 6OE (O07)       | 3.961        |                                                 |              |
| 67 PHE (CA):lipid 6 6OE (H092)      | 4.227        |                                                 |              |
| 67 PHE (CB):lipid 6 6OE (O07)       | 3.83         |                                                 |              |
| 67 PHE (CB):lipid 6 6OE (O08)       | 4.159        |                                                 |              |
| 67 PHE (CB):lipid 6 6OE (C09)       | 4.05         |                                                 |              |
| 67 PHE (CB):lipid 6 6OE (O20)       | 4.037        |                                                 |              |
| 67 PHE (CB):lipid 6 6OE (H092)      | 3.241        |                                                 |              |
| 67 PHE (CB):lipid 6 6OE (H232)      | 4.035        |                                                 |              |
| 67 PHE (CG):lipid 6 6OE (O20)       | 4.277        |                                                 |              |
| 67 PHE (CG):lipid 6 6OE (H092)      | 4.262        |                                                 |              |
| 67 PHE (CG):lipid 6 6OE (H232)      | 3.584        |                                                 |              |
| 67 PHE (CD1):lipid 6 6OE (C23)      | 4.18         |                                                 |              |
| 67 PHE (CD1):lipid 6 6OE (C25)      | 4.223        |                                                 |              |
| 67 PHE (CD1):lipid 6 6OE (H232)     | 3.247        |                                                 |              |
| 67 PHE (CD1):lipid 6 6OE (H252)     | 3.575        |                                                 |              |
| 67 PHE (CD1):lipid 6 6OE (H251)     | 4.095        |                                                 |              |
| 67 PHE (CD2):lipid 6 6OE (H232)     | 4.217        |                                                 |              |
| 67 PHE (CE1):lipid 6 6OE (C24)      | 4.5          |                                                 |              |
| 67 PHE (CE1):lipid 6 6OE (C25)      | 4.143        |                                                 |              |
| 67 PHE (CE1):lipid 6 6OE (H232)     | 3.641        |                                                 |              |
| 67 PHE (CE1):lipid 6 6OE (H241)     | 4.246        |                                                 |              |
| 67 PHE (CE1):lipid 6 6OE (H252)     | 3.308        |                                                 |              |
| 67 PHE (CE1):lipid 6 6OE (H251)     | 4.32         |                                                 |              |
| 67 PHE (CE2):lipid 4 6O9 (C16)      | 4.063        |                                                 |              |
| 67 PHE (CE2):lipid 4 6O9 (H161)     | 3.713        |                                                 |              |
| 67 PHE (CE2):lipid 4 6O9 (H162)     | 3.502        |                                                 |              |
| 67 PHE (CZ):lipid 4 6O9 (C16)       | 4.106        |                                                 |              |
| 67 PHE (CZ):lipid 4 6O9 (H161)      | 4.025        |                                                 |              |
| 67 PHE (CZ):lipid 4 6O9 (H162)      | 3.416        |                                                 |              |
| 67 PHE (CZ):lipid 6 6OE (H232)      | 4.267        |                                                 |              |
| 67 PHE (CZ):lipid 6 6OE (H252)      | 4.28         |                                                 |              |
|                                     |              |                                                 |              |
| 68 ILE ( N ):lipid 6 6OE (O07)      | 4.265        | Predicted as lipid-interacting (MD simulations) |              |
| 68 ILE (CG1):lipid 4 6O9 (H142)     | 3.627        |                                                 |              |
| 68 ILE (CD1):lipid 4 6O9 (C14)      | 4.191        |                                                 |              |

| 5irx structure <sup>1</sup>         |              | Docking model <sup>2</sup>                      |              |
|-------------------------------------|--------------|-------------------------------------------------|--------------|
| toxin residue:channel residue/lipid | distance (Å) | toxin residue:channel residue                   | distance (Å) |
| 68 ILE (CD1):lipid 4 6O9 (H141)     | 3.864        |                                                 |              |
| 68 ILE (CD1):lipid 4 6O9 (H142)     | 3.606        |                                                 |              |
|                                     |              |                                                 |              |
| 70 TYR (OH):lipid 4 6O9 (H212)      | 3.565        | Predicted as lipid-interacting (MD simulations) |              |

### **Detailed procedure for the production of DkTx and its variants**

#### Mutagenesis and cloning:

DkTx variants were generated by performing whole-plasmid PCR on a plasmid provided by Dr. Kenton Swartz' laboratory at the NIH that contained the DkTx gene downstream of the keto-steroid isomerase (KSI) gene in a pET31b vector<sup>3</sup>. PCR products were digested with *Dpn I* to remove methylated parental plasmid and the digested reaction mixture was transformed into *E. coli* NEB Turbo chemically competent cells.

#### Transformation and linear protein preparation:

Mutant DkTx clones were confirmed by sending sequencing samples to 1<sup>st</sup> Base, Malaysia. Positive clones were transformed into chemically competent *E. coli* BL21 (DE3) cells. LB broth cultures (1 L) containing ampicillin (100 µg/mL) were inoculated with transformed *E. coli* BL21 (DE3) cells and induced with IPTG (0.5 mM) on reaching an O.D. (600 nm) of 0.4-0.6 at 37°C. The induced culture was pelleted after 6 h of growth and lysed by sonication in Tris-HCl buffer (20 mM at pH 8.0). The sonicated cell lysate was first centrifuged at 12000 rpm for 1 h and the pellet was dissolved in guanidine hydrochloride solution (6 M), supplemented with L-methionine (67 mM). Fusion protein cleavage was performed by adding the cell lysate to a solution of hydroxylamine hydrochloride (2 M at pH 9) and incubating the resulting mixture at 45°C for 4.5 h. Subsequently, dithiothreitol (66 mM) was added and the resulting mixture was incubated at 45°C for 1 h for performing protein denaturation. This solution was then titrated with conc. HCl to pH 4 and centrifuged to obtain the denatured proteins in the supernatant. Subsequently, the protein solution was dialyzed against water containing 0.1% TFA and then filtered through 0.45 µm syringe filters and lyophilized to yield the linear protein as a white powder.

#### Refolding of linear DkTx variants:

The lyophilized linear protein was dissolved in 50% acetonitrile containing 0.1% TFA at a concentration of 2 mg/mL. This protein solution was then added to a redox refolding buffer containing Tris-HCl (0.4 M), EDTA (1 mM), Triton X-100 (0.5%), GSH (2.5 mM), GSSG (0.25 mM) at pH 8.0 and incubated at 4°C for 2 d. Poorly folding DkTx variants, W53A, W53L and G52A required prolonged incubation of 14 d in the refolding buffer to give good yields. The progression of refolding was assessed by subjecting the refolding cocktail to analytical RP-HPLC on a C18 column (300 Å pore size) with a linear acetonitrile-water (0.1% TFA) gradient (5-65% acetonitrile over 30 min). Once refolded optimally, the refolding cocktail was titrated to pH 4 with conc. HCl to quench the refolding reaction. The refolding cocktail was then

concentrated in a 3500 MWCO dialysis membrane (Thermo Fischer Inc.) against 400 g/L solution of PEG20. The refolded DkTx variants were then purified from the concentrated refolding cocktail by RP-HPLC on a C18 column (300 Å pore size) with a linear acetonitrile-water (0.1% TFA) gradient (5-65% acetonitrile over 30 min). Purified fractions were quantified by spectrophotometric analysis from the absorbance at 280 nm and then aliquoted in 1 nmol aliquots or 4 nmol aliquots, vacuum-dried and stored at -80°C until use for electrophysiological activity assays and partitioning experiments, respectively. Figure S1 depicts representative protein production data and Figure S2 depicts the purity evaluation HPLC runs for all variants. Wild-type and all DkTx variants had an additional glycine residue at their *N*-termini and three additional residues (HYR) in the linker region. The sequence of DkTx referred to as “wild-type” in the manuscript, therefore, is as follows:

GDCAKEGEVCSWGKKCCDLDNFYCPMEFIPHCKKYKPYVPVTTHYRNCAGEGEVCGW  
GSKCCHGLDCPLAFIPYCEKYR

**Figure S1. Representative DkTx purification data.**

DkTx variants were produced as described above (pg. 19-20). The band for the overexpressed DkTx-KSI fusion protein (depicted by an asterisk in the gel picture below) was expected at 24 kDa. Gel lanes have been labeled as followed: I: induced; UI: uninduced; M: molecular weight markers; P: DkTx protein purified by HPLC after refolding (expected at 9 kDa). The red arrow below denotes the peak for the correctly folded toxin in the HPLC chromatogram.

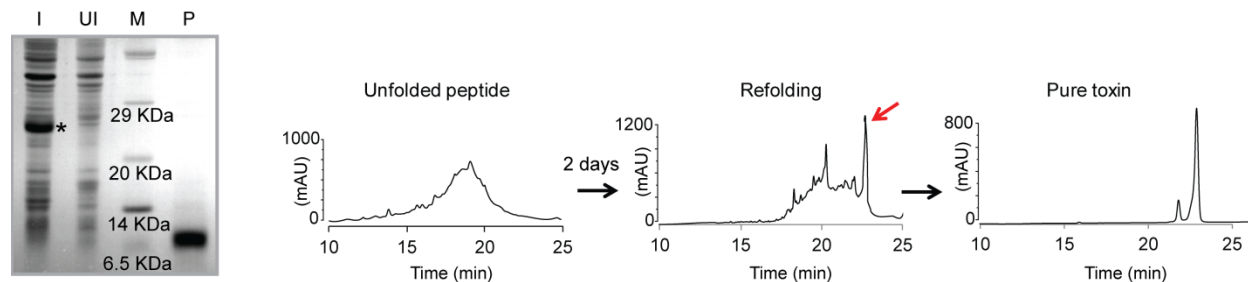

**Figure S2. HPLC traces for purity evaluation of all our DkTx variants.** The absorbance has been measured at 280 nm.

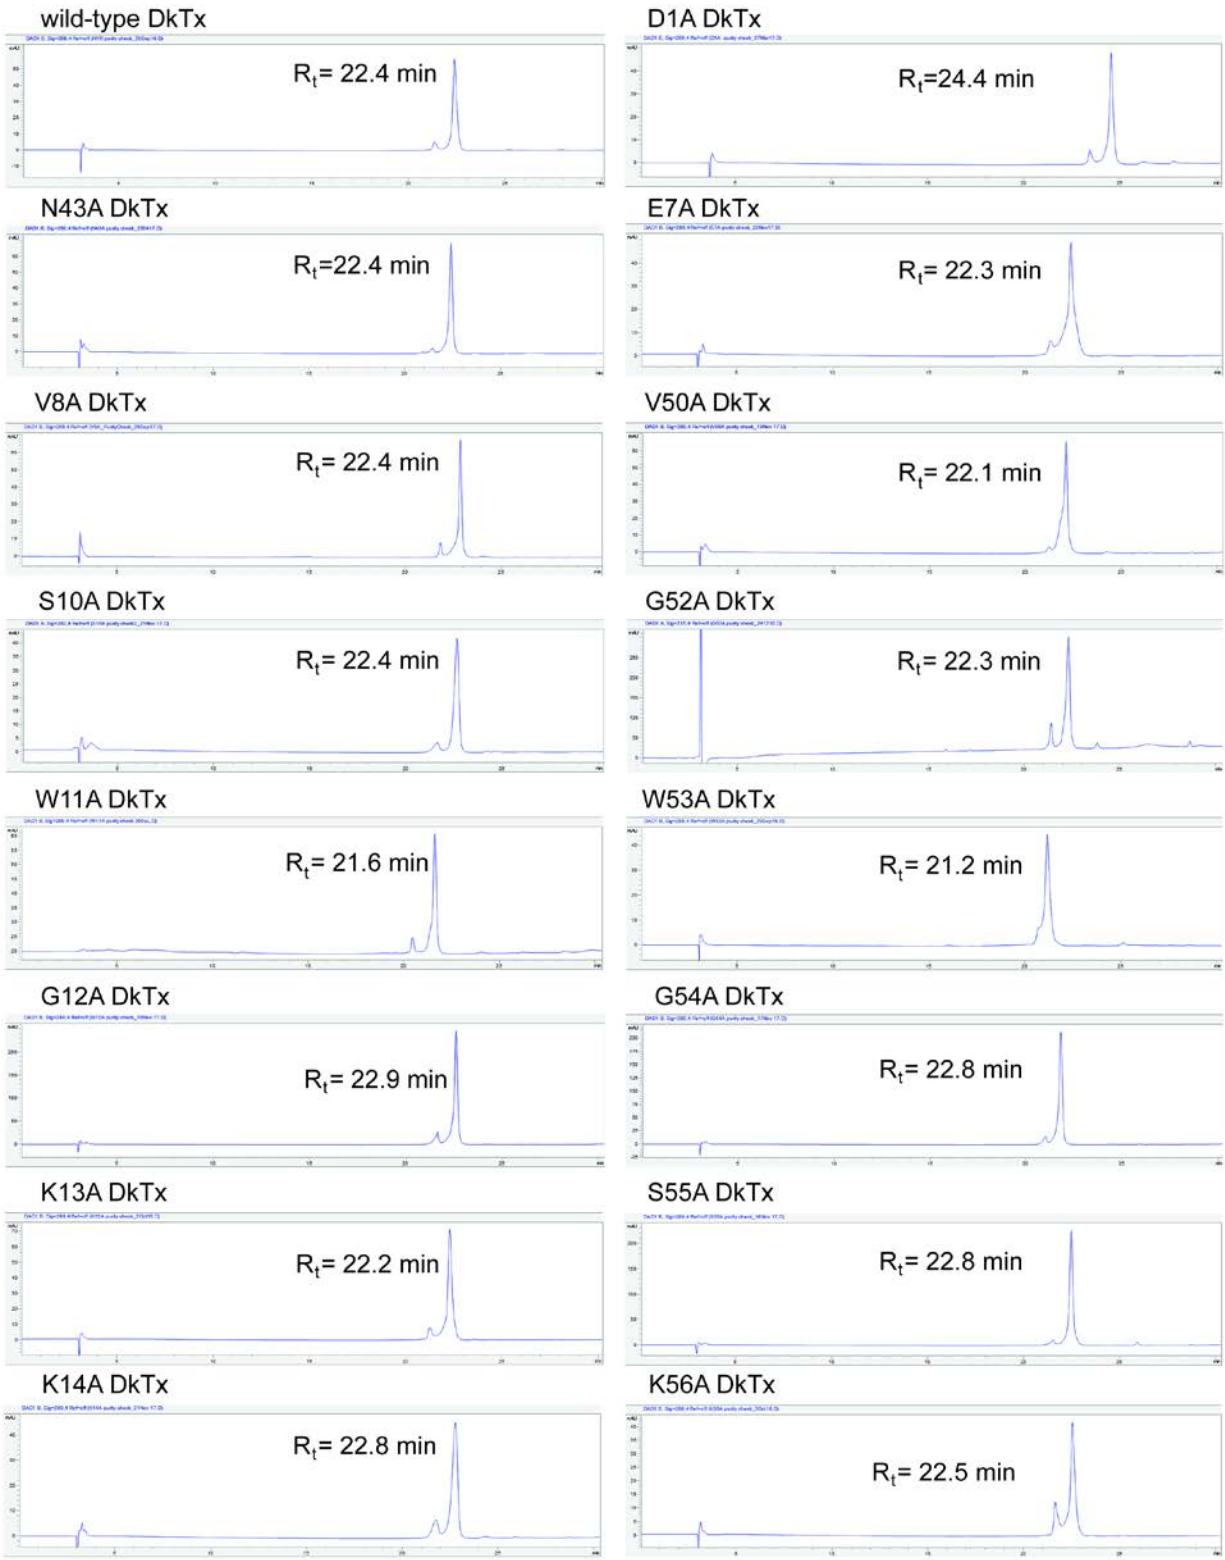

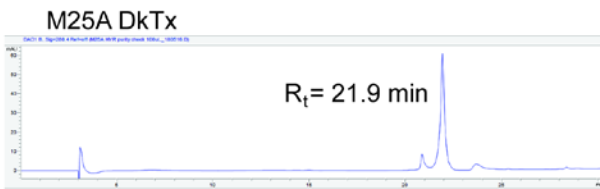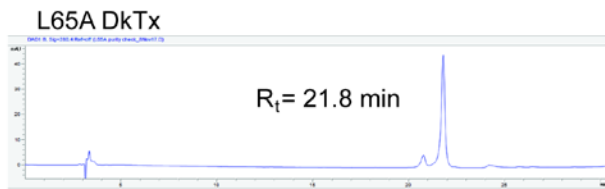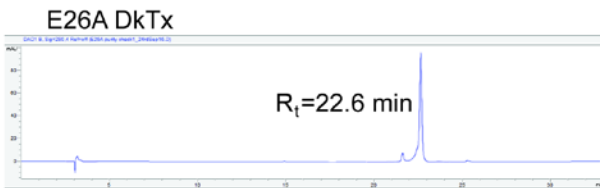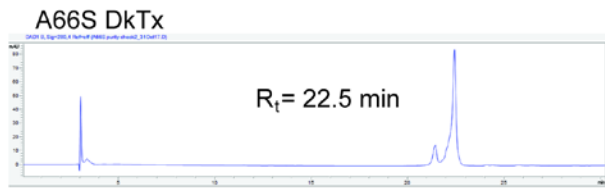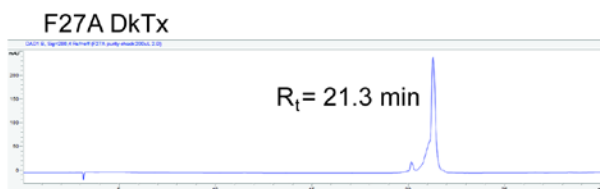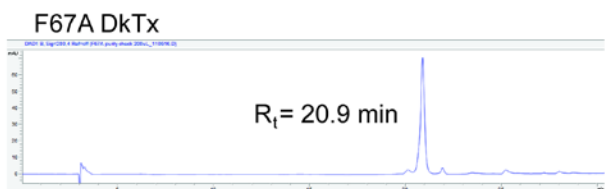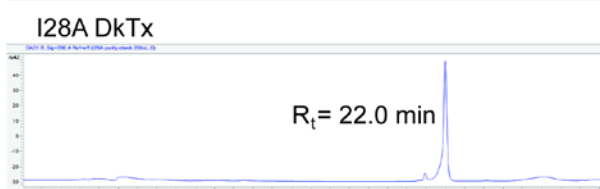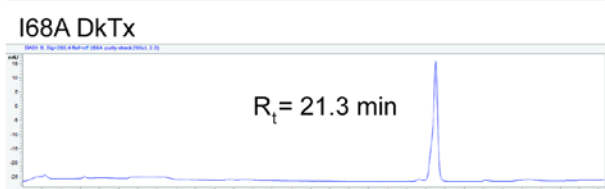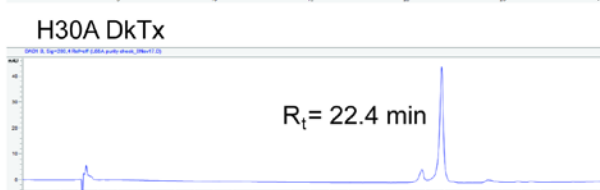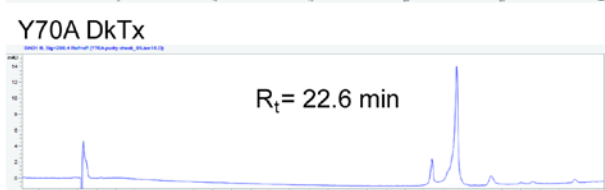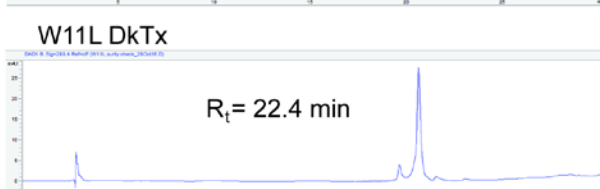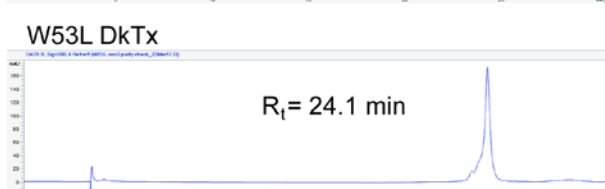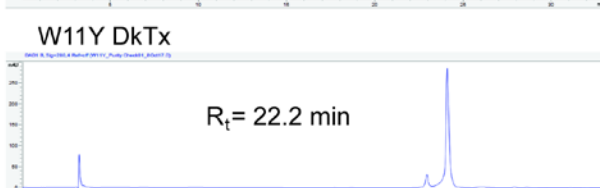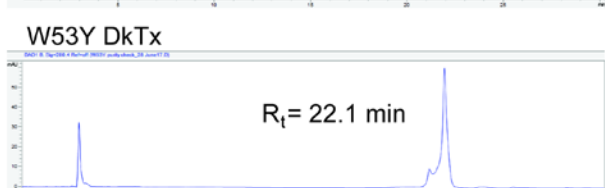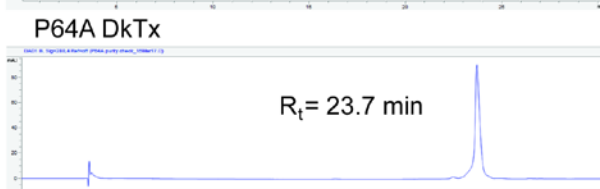

## Electrophysiology and data analysis

### Activity assays on DkTx variants by Two-Electrode Voltage Clamp recordings:

Stage 5 and 6 oocytes from adult female *Xenopus laevis* (the African clawed frog) were surgically removed from anesthetized frogs in accordance with a protocol approved by the Institutional Animal Ethics Committee (IAEC), IISER Pune. Oocytes were digested with collagenase type 2 enzyme (2 mg/mL) in calcium-free OR2 buffer containing NaCl (82.5 mM), KCl (2.5 mM), MgCl<sub>2</sub> (1 mM) and HEPES (5 mM) at pH 7.6 for 1 h at 18°C on an automated rocker and then de-folliculated with cut pipettes. Rat TRPV1 gene cloned in pGEM-HE vector was used to make TRPV1 cRNA by *in vitro* transcription using HiScribe T7 ARCA mRNA Kit (New England Biolabs Inc.) followed by plasmid linearization by *Not I* (New England Biolabs Inc.). De-folliculated oocytes were injected with rTRPV1 cRNA solution (50 nL) in different dilutions (full strength to 1:4 dilution with RNase-free water) and stored at 18°C in ND96 solution containing NaCl (96 mM), KCl (2 mM), HEPES (5 mM), MgCl<sub>2</sub> (1 mM), CaCl<sub>2</sub> (1.8 mM) and gentamycin (50 µg/mL) at pH 7.6. TRPV1 channel recordings were performed on oocytes 1-2 d post-mRNA injection under voltage-clamp conditions by using a two-electrode voltage clamp instrument (Warner Instruments) in a 150 µL recording chamber. The recorded data were filtered and digitized at 0.5 KHz and 2.5 KHz respectively using digidata analog to digital converter and pClamp software (Molecular Devices). Recording microelectrode resistances were between at 0.1-1 MΩ when filled with 3 M KCl solution. The recording buffer contained NaCl (50 mM), KCl (50 mM), MgCl<sub>2</sub> (1 mM), BaCl<sub>2</sub> (0.3 mM) and HEPES (20 mM) at pH 7.4. Oocytes were held at -60 mV during recording and activated by perfusing capsaicin (5 µM in recording buffer), and following complete capsaicin wash-off, different concentrations of the wild-type/variant toxins were pipetted into the recording chamber to trigger toxin-mediated channel activation. The normalized ratios of the toxin-evoked and capsaicin-evoked peak currents were plotted to generate dose response curves. For each concentration of toxin sampling was done at least 3 times.

### Dose-response plots:

The normalized ratio of toxin-induced current to that of the capsaicin current was plotted against the concentration of the toxin and the Hill equation (below) was fit to the data using Origin 9.0:

$$y = A_{\max} \{ (x^n) / (k^n + x^n) \}$$

where  $A_{\max}$  is the normalized maximum  $I(\text{toxin})/I(5 \mu\text{M Capsaicin})$  ratio,  $k$  is  $EC_{50}$  and  $n$  is the Hill coefficient.

### Data analysis to obtain toxin wash-off kinetic plots depicted in Figures 3b (middle panel) and 3c (top panel):

Electrophysiological recordings were used to extract the wash-off traces for 3 or 5 min in axon test file (.atf) format using the “Clampfit 10.5” software. The extracted traces were subjected to data point extraction at every 7500<sup>th</sup> point interval using the R3.4.1 package and the extracted points from 3-5 normalized traces were used to obtain averaged representative traces for wash-off kinetic plots along with their respective standard deviation values (error bars).

**Figure S3. Representative electrophysiological recordings of the DkTx variants.** All traces depicted below were obtained by applying 6.6  $\mu$ M of toxin (unless otherwise mentioned).

**a. Representative current traces for variants of exclusively channel-interacting DkTx residues**

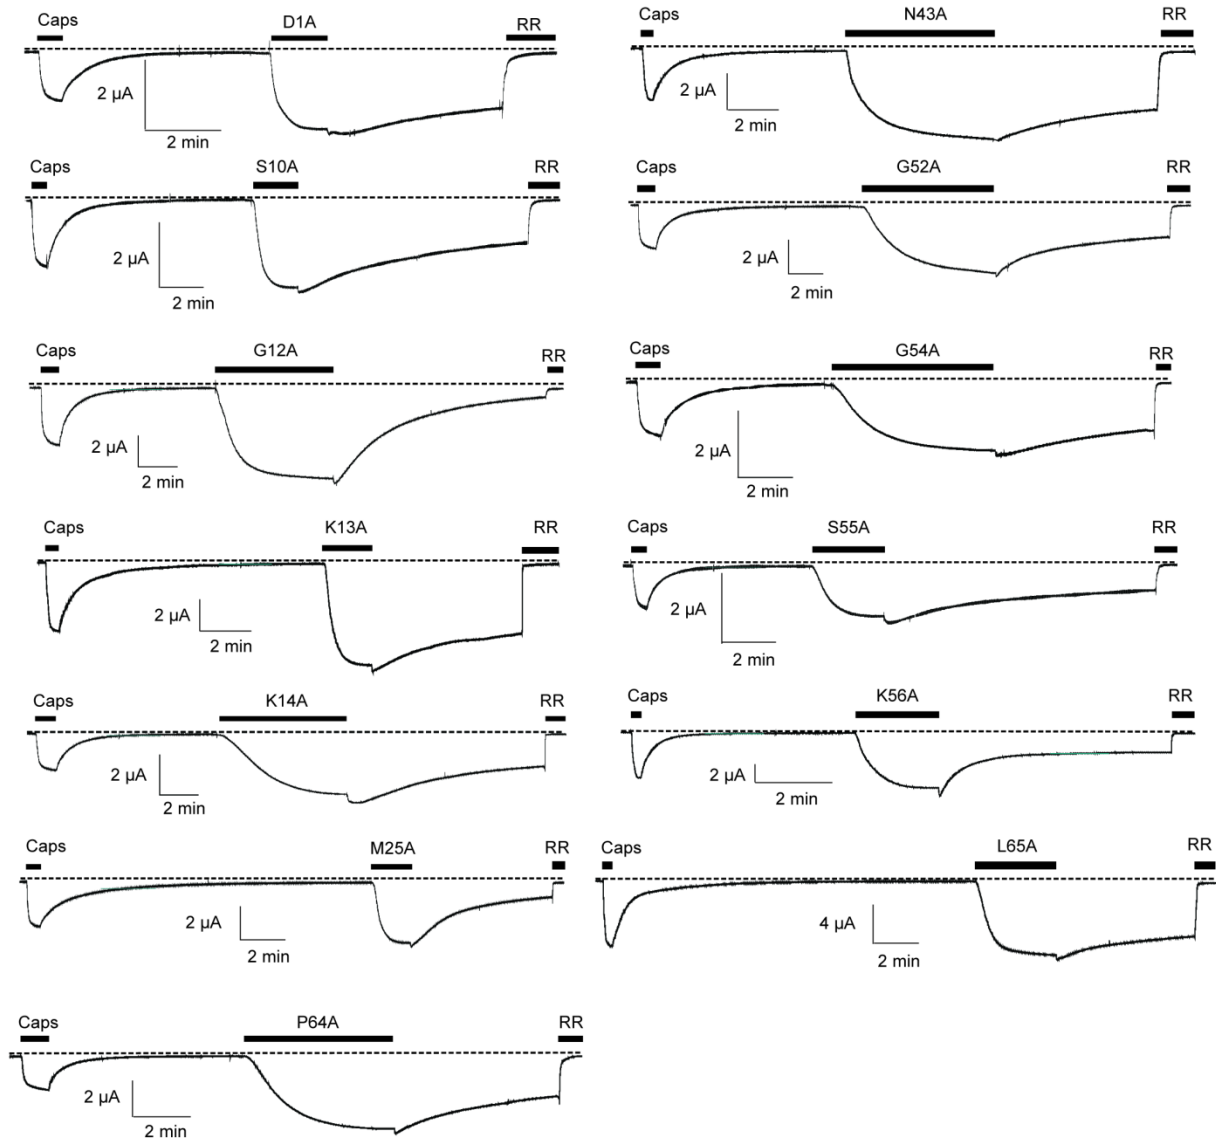



**b. Representative current traces for variants of lipid-interacting DkTx residues**

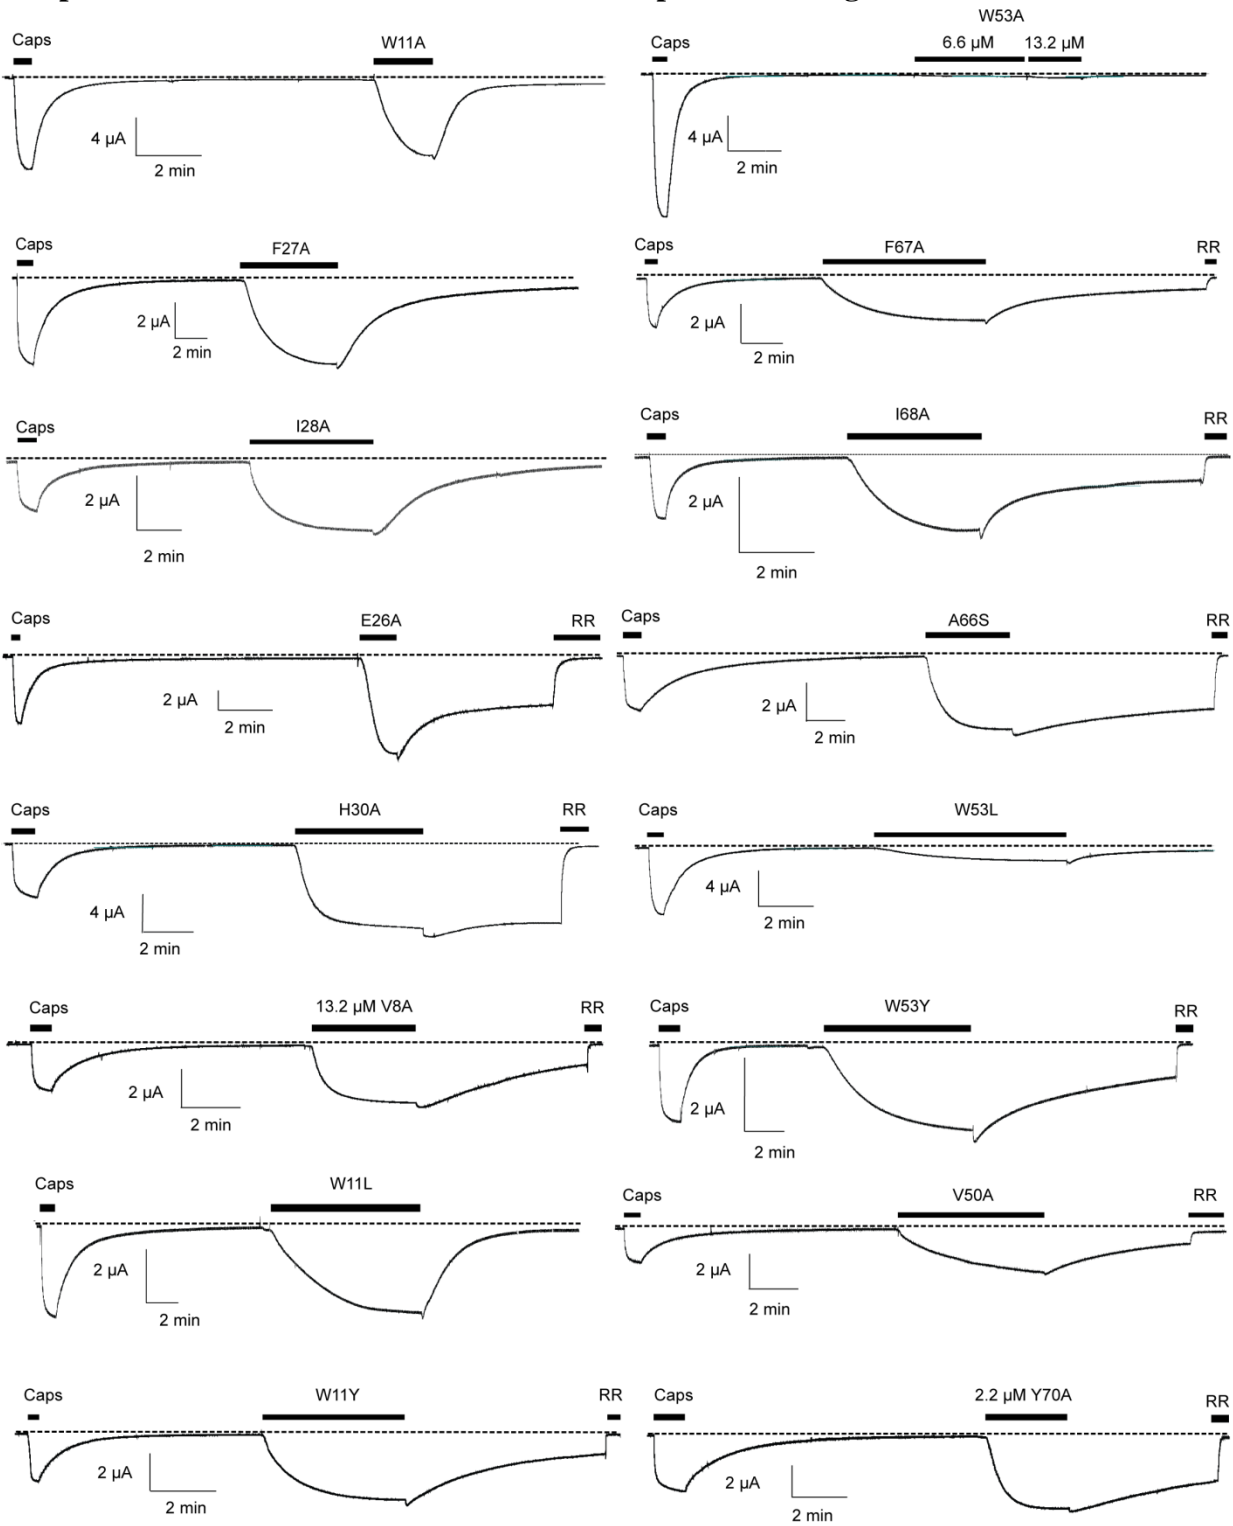

## **Membrane partitioning experiments on LUVs and oocytes**

### **a) Fluorescence-based experiments on large unilamellar lipid vesicles (LUVs):**

*LUV preparation:* 1-palmitoyl-2-oleoyl-*sn*-glycero-3-phosphocholine (16:0-18:1 PC from Avanti Polar Lipids Inc.) and 1-palmitoyl-2-oleoyl-*sn*-glycero-3-phospho-(1'-*rac*-glycerol) (sodium salt) (16:0-18:1 PG from Avanti Polar Lipids Inc.) were mixed at a molar ratio of 1:1 from their chloroform stock solutions, dried under a gentle nitrogen stream and kept in a vacuum desiccator for 9 h. Dried lipid films were rehydrated in HEB buffer at pH 7.0 containing HEPES (10 mM) and EDTA (1 mM). The resulting solution was extruded through 100 nm pore-sized polycarbonate filters (Avanti Polar Lipids Inc.) to generate LUVs.

*Tryptophan fluorescence spectroscopy:* DkTx variants were dissolved in 2 mL of a buffer containing HEPES (10 mM) and EDTA (1 mM) at pH 7.0 to a concentration of 2  $\mu$ M and the resulting solution was excited with 280 nm wavelength light by using a Horiba FluoroMax 4 spectrofluorometer. Emission spectra were recorded between 300 to 450 nm both in the presence and absence of LUVs. Scattering of light from lipid vesicles was corrected following earlier reported methods<sup>4,5</sup> and the data was subjected to a fitting analysis by employing the following equation:

$$F/F_0(L) = 1 + (F/F_0^{\max} - 1)K_x[L]/([W] + K_x[L])$$

where  $F$  is the fluorescence intensity at 320 nm for a given lipid concentration,  $F_0$  is the fluorescence intensity at 320 nm in absence of lipids,  $F_0^{\max}$  is fluorescence intensity at 320 nm at a concentration of lipids where partitioning saturates,  $[L]$  is molar concentration of accessible lipid (60% of total lipid, corresponding to the outer leaflet),  $[W]$  is molar concentration of water (55.3 M), and  $K_x$  is mole-fraction partition coefficient of the DkTx variants.

### **b) Toxin depletion experiments on *Xenopus laevis* oocytes:**

Our toxin-depletion experiments involved incubation of 100 defolliculated stage 5 or 6 oocytes with 4 nmol of DkTx or its variants in 400  $\mu$ L (final volume) of 20 mM HEPES buffer at pH 7.4 containing NaCl (50 mM), KCl (50 mM), MgCl<sub>2</sub> (1 mM) and BaCl<sub>2</sub> (0.3 mM) for 1 h at room temperature. In control experiments, the same concentration and volume of toxin solutions not containing oocytes were used. After incubation, 200  $\mu$ L of the supernatant from each well was removed, spiked with 2-nitrophenol (2.5  $\mu$ L of a 2.5 mg/mL solution in MilliQ water) that served as an internal standard, and 100  $\mu$ L of this solution was subjected to HPLC by employing the same protocol that was used for the purification of DkTx and its variants (described on pg. 19 above). Fractional depletion was calculated as follows:

$$\text{Fraction depletion} = (R_{\text{control}} - R_{\text{oocytes}})/R_{\text{control}}$$

where  $R_{\text{control}}$  is the averaged ratio of the area under the peak for the toxin and the area under the peak for 2-nitrophenol in the control experiments, and  $R_{\text{oocytes}}$  is the ratio of the same parameters obtained from the oocyte samples ( $n = 3-5$ ). Depletion assays on TRPV1-expressing oocytes (Figure S6b) were performed by using an identical protocol on oocytes injected with the TRPV1 cRNA 4 d earlier.

**Figure S4. Interaction of wild-type DkTx and its variants with lipid membranes measured using tryptophan fluorescence.** Tryptophan emission spectra of DkTx and its variants (left panel) in absence (dotted lines) and in presence (solid lines) of LUVs made from a 1:1 molar ratio of POPC: POPG. Relative fluorescence intensity (right panel) at 320 nm ( $F/F_0$ ) as a function of the available lipid concentration (60% of total lipid concentration). Values of  $K_x$  of DkTx variants are provided in Table S2. Error bars correspond to SEM ( $n = 3$  or  $4$ ).

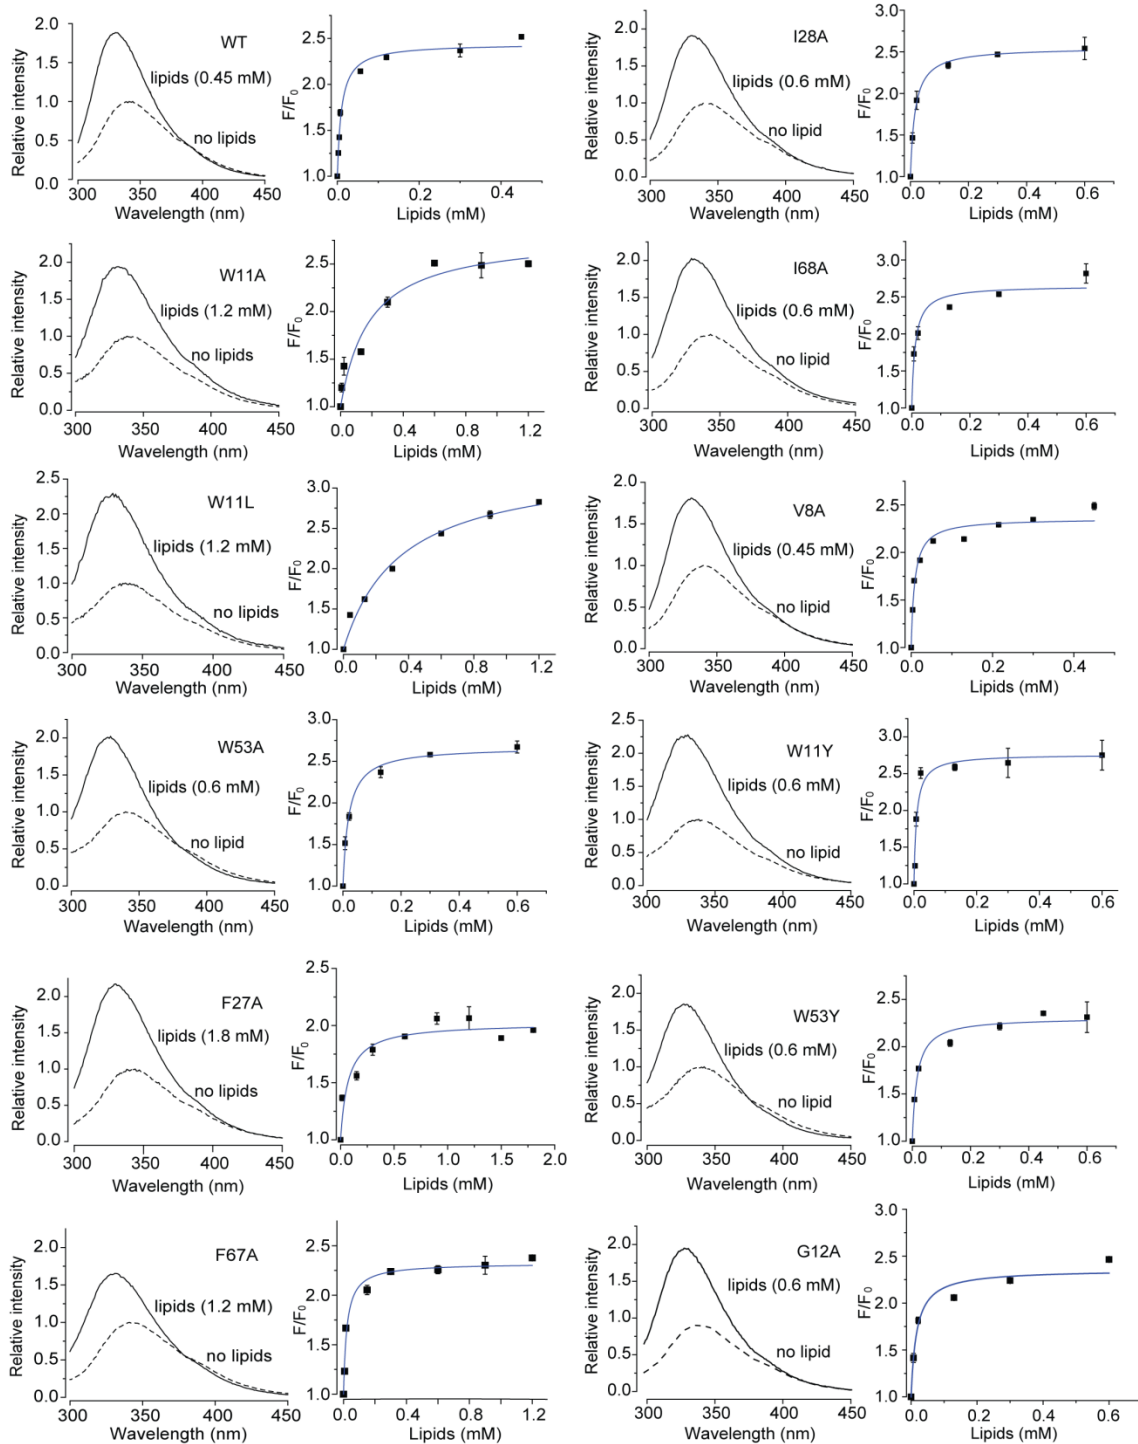

**Figure S5. Mol. fraction partition coefficients of DkTx variants of K2 knot residues.**  
 Comparisons of mol. fraction partition coefficient ( $K_x$ ) values of DkTx and its K2 variants. Error bars correspond to SEM (n = 3 or 4).

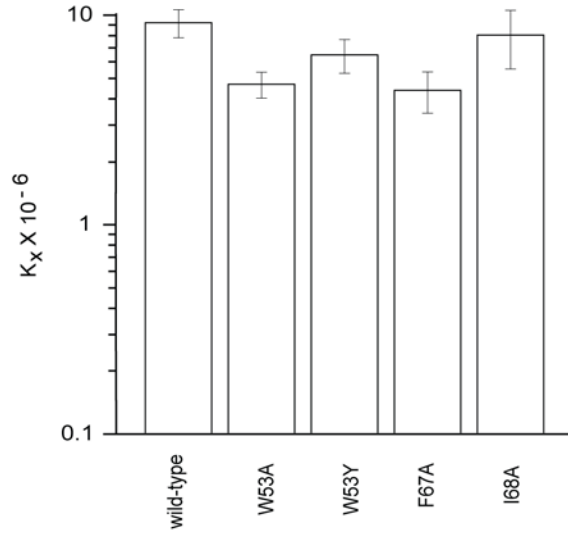

**Figure S6. Toxin depletion assays performed with DkTx and its variants. a.** Overlay of normalized HPLC chromatograms for toxin depletion experiments on DkTx variants on uninjected *Xenopus laevis* oocytes. Control traces are depicted in black and the experimental ones are depicted in red. **b.** Overlay chromatograms (left panel) for the depletion experiments performed with wild-type DkTx on uninjected and TRPV1-expressing oocytes. A bar graph depicting the fractional depletion obtained from the HPLC traces on the left panel is shown on the right panel. Error bars correspond to standard deviation values (n=3-5).

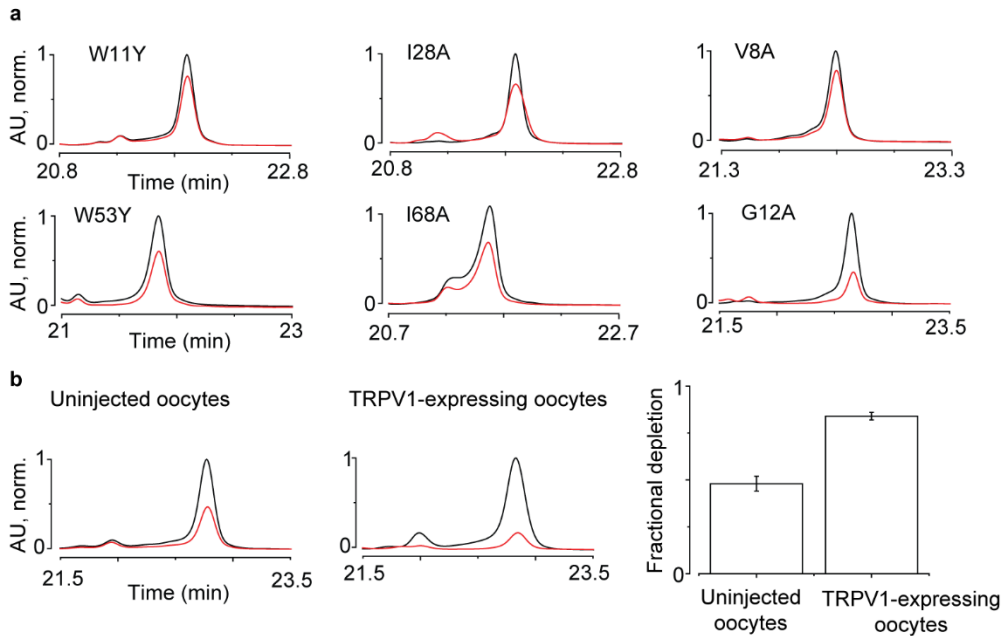

**Table S2. Consolidated data summary for all DkTx variants**

| S. No. | Knot | DkTx variant | Expected mass (a.m.u.) | Observed mass (a.m.u.) | HPLC Retention time (min) | EC <sub>50</sub> (μM) | Fold Change in EC <sub>50</sub> | Hill Coefficient (n <sub>H</sub> ) | % Wash-off after 3 min of buffer perfusion post channel activation by saturation concentration of toxin | Mol. fraction partition coefficient (K <sub>x</sub> ) | Fractional depletion (oocytes) |
|--------|------|--------------|------------------------|------------------------|---------------------------|-----------------------|---------------------------------|------------------------------------|---------------------------------------------------------------------------------------------------------|-------------------------------------------------------|--------------------------------|
| 1      |      | Wild-type    | 9042.5                 | 9043.1                 | 22.4                      | 0.14 ± 0.02           | 1.0                             | 1.32 ± 0.17                        | 33.77 ± 1.26 (1.1 μM)                                                                                   | (9.03±1.38)E6                                         | 0.48 ± 0.04                    |
| 2      | K1   | D1A          | 8998.5                 | 8995.3                 | 24.4                      | 0.08 ± 0.00           | 0.6                             | 1.84 ± 0.22                        | 25.81 ± 3.29 (0.55 μM)                                                                                  | N.D                                                   | N.D                            |
| 3      |      | E7A          | 8984.4                 | 8982.5                 | 22.3                      | 1.59 ± 0.19           | 11.4                            | 1.32 ± 0.17                        | 25.97 ± 4.17 (13.2 μM)                                                                                  | N.D.                                                  | N.D                            |
| 4      |      | V8A          | 9014.4                 | 9012.5                 | 22.4                      | 2.26 ± 0.15           | 16.1                            | 1.13 ± 0.06                        | 59.81 ± 0.69 (13.2 μM)                                                                                  | (1.06±0.21)E7                                         | 0.36 ± 0.01                    |
| 5      |      | S10A         | 9026.5                 | 9027.7                 | 22.4                      | 0.22 ± 0.05           | 1.6                             | 1.67 ± 0.38                        | 12.13 ± 1.50 (1.1 μM)                                                                                   | N.D                                                   | N.D                            |
| 6      |      | W11A         | 8927.4                 | 8925.0                 | 21.6                      | 11.22 ± 1.3           | 80.1                            | 1.68 ± 0.17                        | 95.30 ± 2.45 (26.4 μM)                                                                                  | (4.99±1.86)E5                                         | 0.20 ± 0.02                    |
| 7      |      | W11L         | 8969.4                 | 8970.1                 | 22.4                      | 6.04 ± 2.01           | 43.1                            | 1.54 ± 0.43                        | 83.87 ± 5.10 (19.8 μM)                                                                                  | (2.63±0.57)E5                                         | 0.28 ± 0.03                    |
| 8      |      | W11Y         | 9019.4                 | 9020.9                 | 22.2                      | 1.21 ± 0.04           | 8.6                             | 1.41 ± 0.07                        | 46.92 ± 2.70 (6.6 μM)                                                                                   | (1.1±0.4)E7                                           | 0.33 ± 0.01                    |
| 9      |      | G12A         | 9056.5                 | 9055.6                 | 22.9                      | 1.08 ± 0.11           | 7.7                             | 1.21 ± 0.16                        | 68.91 ± 3.58 (13.2 μM)                                                                                  | (5.55±1.62)E6                                         | 0.62 ± 0.03                    |
| 10     |      | K13A         | 8985.4                 | 8986.9                 | 22.2                      | 0.15 ± 0.02           | 1.1                             | 1.01 ± 0.11                        | 32.35 ± 5.32 (2.2 μM)                                                                                   | N.D                                                   | N.D                            |
| 11     |      | K14A         | 8985.4                 | 8986.1                 | 22.8                      | 0.35 ± 0.07           | 2.5                             | 1.26 ± 0.22                        | 21.44 ± 3.63 (2.2 μM)                                                                                   | N.D                                                   | N.D                            |
| 12     |      | M25A         | 8982.4                 | 8980.6                 | 21.9                      | 0.60 ± 0.13           | 4.3                             | 0.96 ± 0.14                        | 30.56 ± 6.10 (6.6 μM)                                                                                   | N.D                                                   | N.D                            |
| 13     |      | E26A         | 8984.4                 | 8983.9                 | 22.6                      | 0.15 ± 0.03           | 1.1                             | 1.31 ± 0.39                        | 20.78 ± 3.03 (0.55 μM)                                                                                  | N.D                                                   | N.D                            |
| 14     |      | F27A         | 8966.4                 | 8966.3                 | 21.3                      | 1.01 ± 0.02           | 7.2                             | 2.14 ± 0.09                        | 72.67± 5.78 (6.6 μM)                                                                                    | (1.29±0.61)E6                                         | 0.16 ± 0.01                    |
| 15     |      | I28A         | 9000.4                 | 9000.7                 | 22.0                      | 1.03 ± 0.13           | 7.4                             | 1.22 ± 0.20                        | 56.18 ± 5.90 (13.2 μM)                                                                                  | (5.74±0.4)E6                                          | 0.36 ± 0.02                    |
| 16     | H30A | 8976.4       | 8976.9                 | 22.4                   | 0.07 ± 0.00               | 0.5                   | 2.12 ± 0.42                     | 22.05 ± 5.45 (1.1 μM)              | N.D                                                                                                     | N.D                                                   |                                |
| 17     | K2   | N43A         | 8999.4                 | 8998.9                 | 22.4                      | 0.25 ± 0.05           | 1.8                             | 1.47 ± 0.27                        | 42.94 ± 3.39 (1.1 μM)                                                                                   | N.D                                                   | N.D                            |
| 18     |      | V50A         | 9014.4                 | 9014.8                 | 22.1                      | 2.44 ± 0.57           | 17.4                            | 1.13 ± 0.20                        | 29.99 ± 2.93 (19.8 μM)                                                                                  | N.D.                                                  | N.D                            |
| 19     |      | G52A         | 9056.5                 | 9056.0                 | 22.3                      | 0.62 ± 0.22           | 4.4                             | 1.14 ± 0.34                        | 41.06 ± 9.56 (6.6 μM)                                                                                   | N.D                                                   | N.D                            |
| 20     |      | W53A         | 8927.4                 | 8926.2                 | 21.2                      | N.A.                  | >100                            | N.A.                               | N.A.                                                                                                    | (4.6±0.65)E6                                          | 0.49 ± 0.04                    |
| 21     |      | W53L         | 8969.4                 | 8968.2                 | 24.1                      | N.A.                  | >100                            | N.A.                               | N.A.                                                                                                    | N.D                                                   | N.D                            |
| 22     |      | W53Y         | 9019.4                 | 9021.4                 | 22.1                      | 1.11 ± 0.07           | 7.4                             | 1.92 ± 0.22                        | 33.12 ± 1.48 (6.6 μM)                                                                                   | (6.34±1.16)E6                                         | 0.42 ± 0.02                    |
| 23     |      | G54A         | 9056.5                 | 9056.6                 | 22.8                      | 1.32 ± 0.37           | 9.4                             | 0.99 ± 0.16                        | 24.80 ± 3.07 (6.6 μM)                                                                                   | N.D                                                   | N.D                            |
| 24     |      | S55A         | 9026.5                 | 9025.7                 | 22.8                      | 0.14 ± 0.01           | 1.0                             | 1.24 ± 0.07                        | 29.48 ± 3.72 (1.1 μM)                                                                                   | N.D                                                   | N.D                            |
| 25     |      | K56A         | 8985.4                 | 8985.2                 | 22.5                      | 0.24 ± 0.01           | 1.7                             | 1.55 ± 0.07                        | 20.02 ± 6.66 (2.2 μM)                                                                                   | N.D                                                   | N.D                            |
| 26     |      | P64A         | 9016.4                 | 9013.4                 | 23.7                      | 0.45 ± 0.05           | 3.2                             | 2.30 ± 0.63                        | 32.37 ± 2.83 (1.1 μM)                                                                                   | N.D                                                   | N.D                            |
| 27     |      | L65A         | 9000.4                 | 9000.0                 | 21.8                      | 0.54 ± 0.11           | 3.9                             | 1.05 ± 0.18                        | 18.67 ± 7.73 (2.2 μM)                                                                                   | N.D                                                   | N.D                            |
| 28     |      | A66S         | 9058.4                 | 9059.1                 | 22.5                      | 0.20 ± 0.02           | 1.4                             | 1.25 ± 0.14                        | 30.20 ± 5.13 (1.1 μM)                                                                                   | N.D                                                   | N.D                            |
| 29     |      | F67A         | 8966.4                 | 8966.3                 | 20.9                      | 1.76 ± 0.23           | 12.6                            | 1.59 ± 0.28                        | 16.43 ± 5.20 (13.2 μM)                                                                                  | (4.30±0.95)E6                                         | 0.46 ± 0.04                    |
| 30     |      | I68A         | 9000.4                 | 9002.1                 | 21.3                      | 0.64 ± 0.07           | 4.6                             | 2.93 ± 0.98                        | 27.15 ± 5.80 (6.6 μM)                                                                                   | (7.88±2.44)E6                                         | 0.5 ± 0.03                     |
| 31     |      | Y70A         | 8950.4                 | 8950.3                 | 22.6                      | 0.11 ± 0.04           | 0.8                             | 1.61 ± 0.83                        | 36.75 ± 7.34 (0.55 μM)                                                                                  | N.D                                                   | N.D                            |

**Figure S7. a. Potency ( $EC_{50}$ ) vs. mol. partitioning coefficient ( $K_x$ ), and b. Potency ( $EC_{50}$ ) vs. fractional depletion plots.**

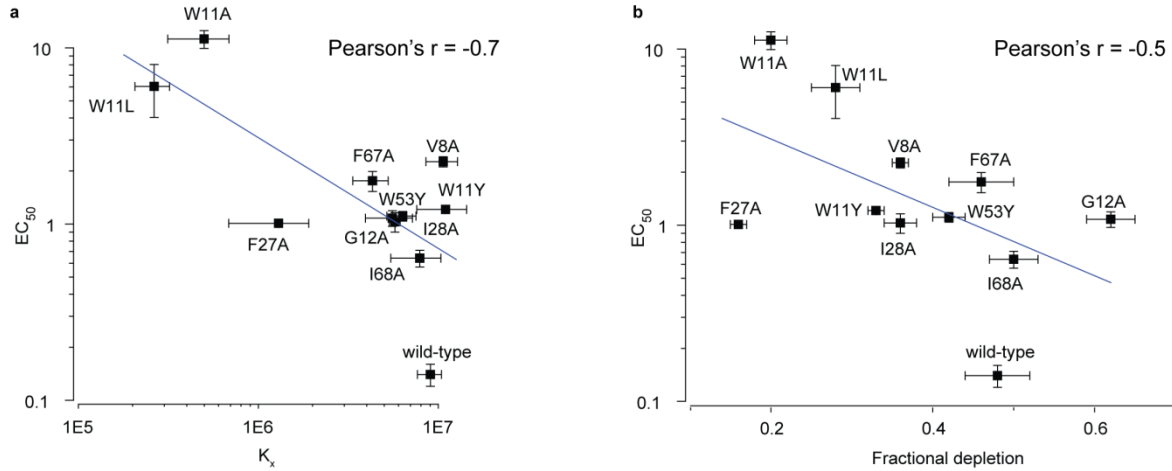

**Structural characterization of DkTx and its variants by Circular Dichroism (CD):**

CD spectroscopic measurements were performed on a Jasco J-815 spectropolarimeter on protein solutions (50  $\mu$ M) in sodium phosphate buffer (10 mM at pH 7.0) in a 0.1 cm cuvette at 25°C. Spectra obtained were reported as molar ellipticity [ $\text{deg}\cdot\text{cm}^2/\text{dmol}$ ]. Each representative spectra is an average of the 5 scans smoothed utilizing the Savitzky-Golay algorithm provided in the spectropolarimeter.

**Figure S8. CD spectra of DkTx and its variants.**

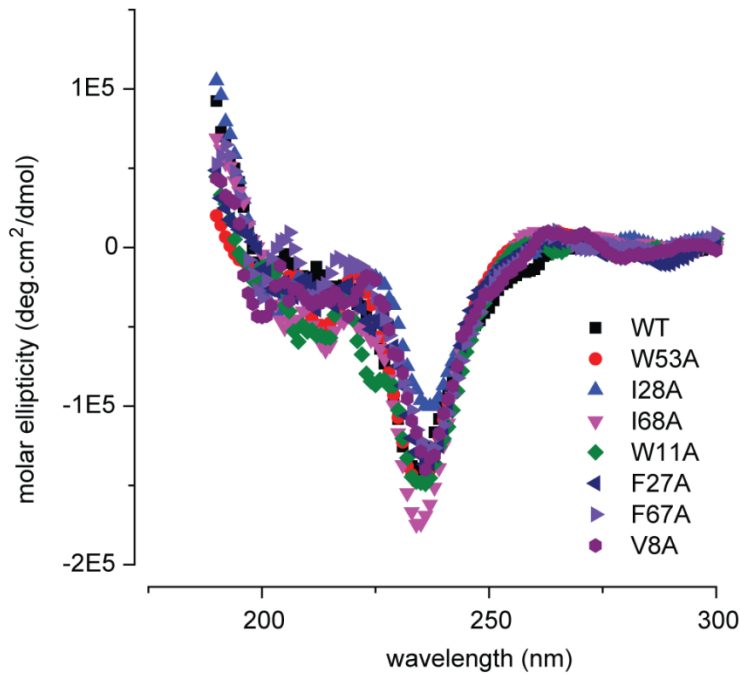

## **References:**

1. Gao, Y., Cao, E., Julius, D., and Cheng, Y. (2016) TRPV1 structures in nanodiscs reveal mechanisms of ligand and lipid action, *Nature* 534, 347-351.
2. Bae, C., Anselmi, C., Kalia, J., Jara-Oseguera, A., Schwieters, C. D., Krepiy, D., Won Lee, C., Kim, E. H., Kim, J. I., Faraldo-Gomez, J. D., and Swartz, K. J. (2016) Structural insights into the mechanism of activation of the TRPV1 channel by a membrane-bound tarantula toxin, *eLife* 5, e11273.
3. Bae, C., Kalia, J., Song, I., Yu, J., Kim, H. H., Swartz, K. J., and Kim, J. I. (2012) High yield production and refolding of the double-knot toxin, an activator of TRPV1 channels, *PLoS One* 7, e51516.
4. Gupta, K., Zamanian, M., Bae, C., Milescu, M., Krepiy, D., Tilley, D. C., Sack, J. T., Yarov-Yarovoy, V., Kim, J. I., and Swartz, K. J. (2015) Tarantula toxins use common surfaces for interacting with Kv and ASIC ion channels, *eLife* 4, e06774.
5. Ladokhin, A.S., Jayasinghe, S., and White, S.H (2000) How to Measure and Analyze Tryptophan Fluorescence in Membranes Properly, and Why Bother? *Anal Biochem* 285, 235-245.
